1                   **Comparative Genome Analysis Reveals Human Pathogenic**  
2                   **Potential of ESBL-*Escherichia coli* Isolated from Swine**  
3                   **Microbiomes**

4  
5  
6                   **Luria Leslie Founou<sup>1,2,3,4\*</sup>, Raspail Carrel Founou<sup>1,4,5</sup>, Mushal Allam<sup>6</sup>, Arshad Ismail<sup>6</sup>,**  
7                   **Sabiha Yusuf Essack<sup>1,4</sup>**

8  
9                   <sup>1</sup>Antimicrobial Research Unit, University of KwaZulu-Natal, Durban, South Africa

10                   <sup>2</sup>Department of Food Safety and Environmental Microbiology, Centre of Expertise and  
11                   Biological Diagnostic of Cameroon (CEDBCAM), Yaounde, Cameroon

12                   <sup>3</sup>Bioinformatics and Applied Machine Learning Research Unit, EDEN Foundation, Yaoundé,  
13                   Cameroon

14                   <sup>4</sup>AMR Insights Ambassador Network

15                   <sup>5</sup>Department of Microbiology, Haematology and Immunology, Faculty of Medicine and  
16                   Pharmaceutical Sciences, University of Dschang, Dschang, Cameroon

17                   <sup>6</sup>Sequencing Core Facility, National Health Laboratory Service, Johannesburg, South Africa

18  
19  
20  
21                   **\*Corresponding author:**

22                   Dr Luria Leslie Founou  
23                   Centre of Expertise and Biological Diagnostic of Cameroon  
24                   Yaounde, 8242  
25                   Cameroon

26                   Email: [luriafounou@gmail.com](mailto:luriafounou@gmail.com)

27                   **Running title:** Genome analysis of ESBL-*E. coli* in Swine

28                   **Words count:** 5276

29                   **Number of Figures:** 4

30                   **Number of Tables:** 6

31                   **Keywords:** Antibiotic resistance, ESBL-*E. coli*, Whole genome sequencing, Population  
32                   Structure, Genetic Diversity, Microbiome

37 **Abstract**

38 **Background:** Extended-spectrum  $\beta$ -lactamase-producing *E. coli* (ESBL-Ec) harbouring  
39 virulence genes in the microbiome of food animals could likely threaten human health but is  
40 poorly understood in Cameroon and South Africa. Here, we assessed the resistome, virulome and  
41 mobilome of ESBL-Ec isolated from swine microbiomes in these countries, using whole genome  
42 sequencing (WGS).

43 **Materials/methods:** Eleven clonally-related phenotypic ESBL-Ec isolates were subjected to  
44 WGS. The isolates were *de novo* assembled using the CLC Genomics Workbench and SPAdes  
45 while RAST and PROKKA were used for annotation of the assembled contigs. Prediction of  
46 antibiotic resistance genes, virulence factors and plasmids was performed using ResFinder,  
47 VirulenceFinder and PlasmidFinder, respectively.

48 **Results:** Diverse STs were detected with sequence types ST2144 and ST88 predominating and  
49 *bla*<sub>CTX-M-15</sub> (55%) as principal ESBL genes. Although the isolates belonged mainly to commensal  
50 phylogroups A/B1 (45/28.3%) and C (18.18%), all harboured at least three extraintestinal  
51 pathogenic *E. coli* (ExPEC) VFs with one isolate harbouring up to 18 ExPEC VFs.

52 **Conclusion:** The resistance and pathogenic potential of ESBL-Ec colonizing the gut microbiota  
53 of swine in both countries demonstrate the urgent need to implement effective strategies to  
54 contain the dissemination of virulent ESBL-Ec through the food chain in Cameroon and South  
55 Africa.

56

57

58

59

60

61

62

63

## 64 **Introduction**

65 Antibiotic resistance (ABR) is a global public health issue that has severe multi-dimensional  
66 repercussions not only in humans, where decades of improvements in healthcare outcomes are  
67 threatened, but also in the food production industry. The causal relationship between the  
68 extensive usage of antibiotics in food animal production and increasing antibiotic resistance in  
69 bacteria affecting humans and animals is widely acknowledged. Antibiotics are used for a variety  
70 of purposes, including therapeutic and non-therapeutic uses as metaphylactics, prophylactics, and  
71 growth-promoters (FAO, 2015, 2016; O'Neill, 2016). Hence, the emergence and spread of ABR  
72 across the farm-to-plate continuum puts occupationally-exposed workers (viz. farmers,  
73 agricultural practitioners, abattoir workers, food handlers, etc.), their close contacts and  
74 consumers at the end of the food chain at risk of contamination or infection by antibiotic resistant  
75 bacteria (ARB) and/or antibiotic resistance genes (ARGs). ABR prevention and containment  
76 measures should focus not only on humans, but also on animals and their associated  
77 environments (Zhang et al., 2017).

78 *Escherichia coli* is a recognized commensal bacterium of the gastrointestinal tract of humans and  
79 animals. The genomic plasticity of *E. coli* strains allows their adaptation to different  
80 environments, hence their wide implication in intestinal and extraintestinal infections in both  
81 humans and animals worldwide (Sarowska et al., 2019). *E. coli* displays a clonal population  
82 structure delineating four main phylogenetic groups (A, B1, B2, and D) with pathogenic strains  
83 belonging to group B2 and D while commensal strains belong to group A and B1.

84 *E. coli* has been suggested as putative reservoir for extended-spectrum  $\beta$ -lactamase (ESBL)  
85 resistance and it has been demonstrated that substantial resistance emerges in commensal  
86 bacteria especially those present in the gastrointestinal tract where horizontal gene transfer

87 prevails and does occur within and between species and genera (Founou et al, 2016; 2019).  
88 ESBL production in *E. coli* is associated with different resistance genes but its most frequently  
89 caused by the production of ESBLs encoded by the *bla*<sub>TEM</sub>, *bla*<sub>SHV</sub> and *bla*<sub>CTX-M</sub> families, with  
90 the latter being the predominant type (Perovic et al., 2014). ESBL-producing *E. coli* have been  
91 detected across the animal, human, and environmental interface worldwide, with the emergence  
92 of specific clones able to acquire ARGs and virulence genes via mobile genetic elements  
93 (MGEs) such as plasmids, transposons, gene cassettes, and other integrative genetic elements  
94 (Founou et al., 2016).

95 Despite the evidence of increasing prevalence of ESBL-producing *E. coli* in food animals, there  
96 is still limited information regarding the genetic structure, diversity and relationship of ESBL-*E.*  
97 *coli* isolates from food animals, especially in the pig industry in Sub-Saharan African countries  
98 such as Cameroon and South Africa. The objectives of this study were thus to use whole genome  
99 sequencing (WGS) and bioinformatics tools to investigate the current population structure,  
100 pathogenicity, genetic diversity and resistomes, virulomes and mobilomes, of ESBL-producing  
101 *E. coli* isolates from swine microbiomes in Cameroon and South Africa in order to ascertain their  
102 pathogenic potential in human health.

## 103 **Materials and Methods**

### 104 **1. Ethical Considerations**

105 Ethical approvals were obtained from the National Ethics Committee for Research in Human  
106 Health of Cameroon (**Ref. 2016/01/684/CE/CNERSH/SP**) as well as from the Biomedical  
107 Research Ethics Committee (**Ref. BE365/15**) and Animal Research Ethics Committee (**Ref.**  
108 **AREC/091/015D**) of the University of KwaZulu-Natal. Approvals were additionally obtained  
109 from the Cameroonian Ministry of Livestock, Fisheries and Animal Industries (**Ref.**

110 **061/L/MINEPIA/SG/DREPIA/CE)** and Ministry of Scientific Research and Innovation (**Ref.**  
111 **015/MINRESI/B00/C00/C10/C14**). This study was further placed on record with the South  
112 African National Department of Agriculture, Forestry and Fisheries [**Ref.** 12/11/1/5 (878)].

## 113 **2. Study Design and Bacterial Isolates**

114 The study sample consisted of eleven putative ESBL-positive *E. coli* isolates that were collected  
115 between March and October 2016 as part of a larger study where ESBL-producing  
116 *Enterobacteriales*, were collected from three abattoirs in Cameroon and two in South Africa  
117 (n=2). These isolates originating from nasal (n=6) and rectal swabs (n=5) from healthy pigs  
118 processed at abattoirs, were identified as putative, closely related ESBL producers via VITEK 2  
119 system and enterobacterial-repetitive-polymerase chain reaction (ERIC-PCR) analysis,  
120 respectively (Founou et al., 2018).

## 121 **3. Identification, ESBL Screening and Antimicrobial Susceptibility Testing**

122 All samples were cultured on MacConkey agar supplemented with 2 mg/L cefotaxime and  
123 incubated for 18-24 h at 37<sup>0</sup>C in normal atmosphere (Founou et al., 2019). All putative ESBL-  
124 producers, were phenotypically characterized to the genus level using Gram staining and  
125 biochemical tests (catalase and oxidase tests). The isolates were thereafter phenotypically  
126 confirmed using the VITEK 2 system.

127 The VITEK 2 system was further used for ESBL screening along with the double disk synergy  
128 test as previously described (Founou et al., 2019). A series of 18 antibiotics encompassed in the  
129 Vitek<sup>®</sup> 2 Gram Negative Susceptibility card (AST-N255) were tested using Vitek<sup>®</sup> 2 System and  
130 (BioMérieux, Marcy l'Etoile, France). Breakpoints of the CLSI guidelines (CLSI, 2016) were  
131 used except for the colistin, amoxicillin + clavulanic acid, piperacillin/tazobactam, amikacin for

132 which EUCAST breakpoints (EUCAST, 2016) were considered with *E. coli* ATCC 25922 and *K.*  
133 *pneumoniae* ATCC700603 being used as controls.

#### 134 **4. Whole genome sequencing and data analysis**

##### 135 **4.1.Purification, Sequencing and Pre-Processing of Genomic Data**

136 GenElute® bacterial genomic DNA kit (Sigma-Aldrich, St. Louis, MO, USA) was used for  
137 genomic DNA (gDNA) extraction with the concentration and purity assessed using agarose gel  
138 electrophoresis, NanoDrop 8000 spectrophotometer (Thermo Scientific, Waltham, MA, USA),  
139 and fluorometric analysis Qubit® (Thermo Scientific, Waltham, MA, USA). Libraries were  
140 constructed using the Nextera XT DNA Library Preparation kit (Illumina Inc., San Diego, CA,  
141 USA) and subjected to paired-end (2×300 bp) sequencing on an Illumina MiSeq (Illumina Inc.,  
142 San Diego, CA, USA) machine with 100× coverage. The generated paired-end reads were  
143 merged, checked for quality, trimmed, and *de novo* assembled into contigs with the Qiagen CLC  
144 Genomics Workbench version 10.1 (CLC, Bio-QIAGEN, Aarhus, Denmark) and SPAdes  
145 version 3.11 (Bankevich et al., 2012) to overrule any inherent shortfalls from both assemblers.

##### 146 **4.2.WGS-based molecular typing**

147 WGS data was used to predict *in silico* multi-locus sequence type (MLST) based on the Achtman  
148 scheme which considers allelic variation amongst seven housekeeping genes (*adk*, *fumC*, *gyrB*,  
149 *icd*, *mdh*, *purA* and *recA*) to assign STs (Larsen et al., 2012). In addition to generating an *E. coli*  
150 MLST assignment for each isolate, core-genome MLST (cgMLST) was assigned based on a  
151 scheme from EnteroBase server (<http://enterobase.warwick.ac.uk/species/ecoli>) that uses 2 513  
152 loci (Alikhan et al., 2018). EnteroBase was further used for *in silico* phylotype predictions  
153 following the Clermont scheme (Clermont et al., 2013) as well as for *fimH* allelic designations

154 (Alikhan et al., 2018). Ribosomal MLST, hierarchical cgMLST clustering, wgMLST were  
155 further performed using core genome data in EnteroBase.

### 156 **4.3. *In Silico* Resistome and Virulome Profiling**

157 ARGs of the *E. coli* genomes were annotated and identified with ResFinder (Zankari et al., 2012)  
158 through the bacterial analysis online platform of GoSeqIt tool. The Comprehensive Antibiotic  
159 Resistance Database (CARD) platform was concomitantly used for prediction of ARGs and  
160 detection of chromosomal mutation (SNPs) in quinolones ARGs *gyrA*, *gyrB*, *parC* and *parE*.  
161 The selected threshold and the minimum percentage of the gene length detected were set to 90%  
162 identity for a positive match between the reference database and a target genome.  
163 VirulenceFinder (Joensen et al., 2014) available from the GoSeqIt tools server along with the  
164 comparative pathogenomics platform VFalyzer from Virulence Factor Database (VFDB) (Liu  
165 et al., 2019) were similarly used to predict and annotate virulence factors (VFs), respectively,  
166 with a threshold of 90% identity. ExPEC virulence genes including ferric aerobactin receptor  
167 (*iutA*), increased serum survival (*iss*); heat-resistant agglutinin (*hra*), temperature sensitive  
168 haemagglutinin (*tsh*); P fimbrial adhesin (*papC*); colicin V (*cvaC*) and capsular polysialic acid  
169 virulence factor group 2 (*kpsII*) and invasive factor of brain endothelial cells locus A (*ibeA*) of *E.*  
170 *coli* strains responsible for neonatal meningitis in humans were investigated *in silico*. Moreover,  
171 the pathogenicity prediction web-server PathogenFinder (Cosentino et al., 2013) was used to  
172 predict bacteria pathogenic potential towards human hosts.

### 173 **4.4. Detection of mobile genetic elements**

174 The RAST SEED viewer (Overbeek et al., 2014) and Artemis Comparison Tool (ACT) were  
175 used to identify the presence of transposases and integrons flanking resistance and virulence  
176 genes. MGEFinder of the Center for Genomic and Epidemiology was used for the *in-silico*

177 detection of insertion sequences (IS), conjugative genetic elements and transposons allowing  
178 investigation of synteny of mobile genetic elements with VFs and antibiotic resistance genes  
179 (Durrant et al., 2020). PHAge Search Tool Enhanced Release (PHASTER) server was used for  
180 the identification, annotation and visualization of prophage sequences (Zhou et al., 2011). The  
181 profile of bacterial plasmid replicons and plasmid incompatibility groups was assessed through  
182 PlasmidFinder 2.1 (<https://cge.cbs.dtu.dk/services/PlasmidFinder/>) and pMLST 2.0  
183 (<https://cge.cbs.dtu.dk/services/pMLST/>) (Carattoli et al., 2014). Putative CRISP system and Cas  
184 cluster were assessed through CRISPRCasFinder ([https://crisprcas.i2bc.paris-](https://crisprcas.i2bc.paris-saclay.fr/CrisprCasFinder/Index)  
185 [saclay.fr/CrisprCasFinder/Index](https://crisprcas.i2bc.paris-saclay.fr/CrisprCasFinder/Index)).

#### 186 **4.5. Genome visualization and gene annotation**

187 The *de novo* assembled raw reads were annotated using the Rapid Prokaryotic Genome  
188 (PROKKA) version 1.12 beta available from EnteroBase, the NCBI Prokaryotic Genome  
189 Annotation Pipeline (PGAP) and RAST 2.0 server (<http://rast.nmpdr.org>) (Aziz et al., 2008)  
190 which identified encoding proteins, rRNA and tRNA, assigned functions to the genes and  
191 predicted subsystem represented in the genome. The size, GC content, average coverage, length,  
192 N50, L50, RNAs and protein coding sequences were obtained for each isolate. The annotated *in*  
193 *silico* predicted proteins and regions were visualized via the JSBrowser of EnteroBase server and  
194 RAST. The genomes of the isolates were visualized using the CG Viewer Server (Grant et al.,  
195 2012). In addition, the contigs were mapped against the complete genome of *E. coli Ecol\_AZI55*  
196 (NZ\_CP019005.1) for visualization of the genomic organization.

#### 197 **4.6. Comparative phylogenomic analyses**

198 The whole genome phylogenetic relationship was assessed within the study isolates and with a  
199 collection of international *E. coli* genomes ( $n = 118$ ) available at the Enterobase *E. coli* genomes



200 repository as of 12 November 2020. The international isolates were closely related *E. coli* strains  
201 of similar STs isolated from various sources (humans, livestock and environment).  
202 The *E. coli* isolate YA00194039 (ERS4920643) was used as reference genome with all  
203 assembled contigs being aligned against it to determine SNP locations. The phylogeny of the *E.*  
204 *coli* isolates was characterised using the whole genome MLST (wgMLST), core genome MLST  
205 (cgMLST) and accessory genome MLST. Phylogenetic relationships among study isolates and  
206 between study and international isolates were assessed based on nucleotide alignments of all the  
207 genes in the entire genome (wgMLST) and core genome content (core genes that are present in  
208 most genomes with  $\geq 95\%$  of nucleotide identity; cgMLST). Moreover, the accessory gene  
209 including ARGs, plasmid replicons and phages content was analysed using the Enterobase server  
210 which scans the genome against the core ResFinder and PlasmidFinder databases based on a  
211 percentage identity of  $\geq 90\%$  and coverage of  $\geq 70\%$  in order to generate a customized  
212 phylogenetic tree to infer the evolutionary relationship within the study isolates and between the  
213 study and international isolates. GrapeTree minimum spanning and phylogenetic trees were  
214 further built to describe the relatedness among the study isolates and between the study and  
215 international isolates. The generated phylogenomic trees were downloaded, and subsequently  
216 visualized and edited using MicroReact ([www.microreact.org](http://www.microreact.org)).

## 217 **Results**

### 218 **1. Baseline characteristics and phenotypic analyses**

219 All the *E. coli* isolates were ESBL producers and high level of resistance to amoxicillin,  
220 cefuroxime, cefuroxime axetil, as well as to third (cefotaxime, ceftazidime) and fourth  
221 generation (cefepime) cephalosporins were observed. All isolates were resistant to trimethoprim-  
222 sulfamethoxazole and susceptible to cefoxitin, ertapenem, meropenem, imipenem and

223 tigeicycline. Altogether, three resistance patterns were identified with the pattern  
224 AMP.AMC.TZP.CXM.CXM-A.CTX.CAZ.FEP.TMP/SXT (82%) being the most prevalent one.  
225 Two isolates displayed multidrug resistance (MDR; resistance to three or more antibiotic  
226 families) with one isolate, PN256E8, being resistant to colistin with a minimum inhibitory  
227 concentration (MIC) of 8 mg/L. All but two isolates were susceptible to nitrofurantoin. Relevant  
228 population data, specimen source, phenotypic and genotypic characteristics for these isolates are  
229 summarized in Supplementary Table 1.

## 230 **2. Genomic features**

231 Table 1 and Table S1 depict all the genomic characteristics including length, GC content, N50,  
232 coverage, coding sequences, RNAs, rMLST, phylotype, serotype, CRISPR arrays, etc. of the  
233 isolates. The genome size of the isolates ranged from 4.5 Mb to 5.3 Mb with a GC content of  
234 50.5 to 50.9 and coverage of 111 to 188.

## 235 **3. Antimicrobial resistance phenotypes and genotypes**

236 Whole genome-based resistomes corroborated the observed phenotypic profiles. All isolates  
237 evidenced relatively similar combinations of resistance genes encoding target modification,  
238 antibiotic inactivation, antibiotic efflux pumps and regulators. All *E. coli* isolates harboured  
239 *bla*<sub>CTX-M</sub> with *bla*<sub>CTX-M-15</sub> (n=6; 54.54%) being the most frequently identified. The *bla*<sub>CTX-M-14</sub>  
240 (PR209E1, PR246B1C) was detected in two isolates as was the *bla*<sub>CTX-M-1</sub> (PN256E1, PN256E2).  
241 Three isolates simultaneously harboured the *bla*<sub>CTX-M-15</sub> and *bla*<sub>TEM-1B</sub> whilst one isolate,  
242 PN256E8 harboured concomitantly the *bla*<sub>CTX-M-15</sub>, *bla*<sub>TEM-1B</sub>, *bla*<sub>TEM-141</sub> and *bla*<sub>TEM-206</sub> (Table 2).  
243 Although only two isolates (PR010E3, PN256E8) displayed phenotypic resistance to  
244 aminoglycosides, all except two isolates (PR256E1, PN256E2) harboured aminoglycoside  
245 resistance genes including *str*, *aac*, *aad* and *aph*. Specifically, *aph* was identified in six isolates:

246 *aph(3'')-Ib* (6/11, 55%) and *aph(6)-Id* (6/11, 55%) genes (Table 2). Eight (73%) isolates  
247 harboured different *aad* genes; including *aadA5* (3/11; 27%), *aadA1* (3/11; 27%) and  
248 *aadA2*(2/11; 18.18) (Tables 1). Four (36%) isolates harboured *aac* genes including *aac(3)-IIa*  
249 (1/11; 9%), and *aac(6)-Ib* (3/11; 27%).

250 Several types of plasmid-mediated quinolone resistance (PMQR) genes were identified in the  
251 isolates (Table 2). Specifically, the *QnrS1* gene was present in four (36%) isolates, whilst the  
252 *aac(6')Ib-cr* and *OqxAB* genes were identified in three isolates (27%) each. Mutations in the  
253 *gyrA* quinolone resistance-determining region (*QRDR*) genes was observed in two isolates  
254 (PR010E3, PN091E1II). *gyrA* had three mutations with two (**S83L**, **D87N**) occurring within  
255 PR010E3 and one in PN091E1II (**S83A**) (Table 2). All isolates, except for PN256E8 and  
256 PR010E3, for which PMQR gene was identified in both and additionally QRDR in the latter,  
257 were susceptible to ciprofloxacin.

258 All isolates displayed concomitant resistance to trimethoprim and sulfamethoxazole with all  
259 harbouring *sul* genes. Specifically, *sul2* gene was identified in nine (82%) isolates alone and in  
260 combination with *sul1* gene in one (PR010E3). The rarely evidenced *sul3* gene, was identified in  
261 two isolates (PR246B1C, PR209E1). Similarly, the *dfr* gene was identified in 7/11 (64%)  
262 isolates, specifically *dfrA17* (n=3), *dfrA14* (n=3) and *dfrA1* (n=1). Diverse permutations of *dfr*  
263 and *sul* genes occurred in the isolates. For instance, *sul2* and *dfrA14* were identified in 3/11  
264 (27%) while *sul2* and *dfrA17* were detected in two isolates. One isolate, PR010E3 harboured  
265 *sul2*, *sul1* and *dfrA17* concomitantly. In the two isolates harbouring the *sul3* gene, the  
266 fosfomycin resistance gene *fosA3* was also detected along with the chloramphenicol resistance  
267 gene *cmlA1*. Likewise, in the two isolates harbouring *dfrA17*, the florfenicol resistance gene *floR*  
268 was also detected (Table 2). One isolate (9%) harboured the *mcr-1* gene in a full-length copy of a

269 colistin resistance gene showing 100% nucleotide similarity to the reference database sequence  
270 (Table 2).

#### 271 **4. Whole-genome virulome profiling and pathogenicity**

272 The virulomes of all *E. coli* displayed high level of pathogenicity (Table 3). The ESBL-*E. coli*  
273 isolates showed a 93.6% mean probability (P score) of being human pathogens. The pathogenic  
274 species with the highest linkage (100% identity) were the *E. coli* APEC O1 (Accession numbers:  
275 DQ517526, DQ381420), *E. coli* UMN026 (Accession number: CU928163) and *E. coli* UTI89  
276 (Accession number: CP000243) which are all extraintestinal pathogenic strains in animals  
277 (poultry) and humans belonging to the pathogenic phylogroup B2.

278 Altogether, over 470 putative virulence factors (VFs) were detected in all isolates. The VFs  
279 belonged to major functional categories including: adhesins, toxins, protectins and invasins, iron  
280 uptake/siderophores, anti-phagocytosis, secretion systems and autotransporters (Table 3). The  
281 isolate PR85E1 harboured the highest number (133) of VFs, followed by the isolates PN256E2  
282 and PR010E3 with 76 and 63 VFs, respectively. All except PR246B1C, PN256E8 and  
283 PN027E6II isolates had more than 20 VFs. Analysis of the virulence genotype *fimH* showed that  
284 it was present in 64% of the isolates. Among putative VFs, autotransporter adhesin *ehaB*, invasin  
285 of brain endothelial cells locus B (*ibeB*) and invasin of brain endothelial cells locus locus C  
286 (*ibeC*), belonging to autotransporter protein and invasins, were the most prevalent (>73%, 8/11)  
287 VFs across the isolates (Tables 3-4). The episomal *iss* gene was detected in 55% of isolates  
288 whilst *papC*, periplasmic iron-binding protein *sitA* (*sitA*), siderophore yersiniabactin receptor  
289 (*fyuA*) genes were identified in 27% (3/11) isolates. Similarly, the prevalence of protectin genes  
290 including the complement resistance protein *traT* was the same as that of iron acquisition genes  
291 *iroN* and *iutA* (Tables 3-4). Interestingly, the avian hemolysin gene F (*hlyF*) that enhance

292 production of outer membrane vesicles (OMVs) and lead to autophagy of eukaryotic cells was  
293 detected in one isolate while the hemolysin E (*hlyE*) a pore-forming toxin was observed in 34%  
294 (4/11) isolates.

295 Our findings showed that rectal *E. coli* isolates harboured more VFs than nasal isolates with  
296 prevalence of VFs ranging from 6 to 133 against 4 to 76 in nasal isolates. Putative VFs for  
297 invasion, such as the outer membrane protein T (OmpT) and the *traT* genes were most prevalent  
298 in rectal than nasal isolates. However, the polysialic acid transport protein group 3 (*KpsMIII*)  
299 gene encoding for group 3 capsule, was detected only in nasal isolates as were the unique *vat* and  
300 *astA*. Specifically, all *E. coli* isolates harboured at least one ExPEC VF from each of the major  
301 functional categories and up to 18 ExPEC VFs (Table 3).

## 302 **5. Phylogenetic groups and multilocus sequence typing, serotyping and phylotyping**

303 Based on *in silico* MLST results, four *E. coli* isolates were assigned to the pandemic ST88 (n=2)  
304 and ST2144 (n=2) clones, while the remaining isolates were assigned to six single-locus variants,  
305 namely, ST10, ST69, ST226, ST944, ST4450 and ST44. Interestingly, the two *E. coli* ST88  
306 strains, PN256E2 and PR256E1, were detected in nasal and rectal pools of the same pig while  
307 the *E. coli* ST2144 were both isolated from two rectal pools of swine originating from the same  
308 farm and processed within the same abattoir (SH004).

309 The majority of the isolates were assigned to commensal phylogroups A (45%), B1 (28%) and C  
310 (18%) but one belonged to the virulence phylogroup D (9%). The serotype O:-H49 (18.18%) and  
311 O:-H18 (18.18%) were the principal serotypes detected while the *fimH1250* (18.18%) and  
312 *fimH87* (18.18%) were the predominant *fimH* gene observed.

## 313 **6. Mobile genetic elements**

314 WGS analysis identified 15 different plasmid replicons in all the isolates, which further all  
315 harboured multiple plasmid replicons concomitantly. Ten types of incompatibility (Inc) plasmid  
316 replicons were identified with different frequencies including IncY, IncFIA, IncFIB (AP001918),  
317 IncFIC(FII), IncFII, IncN, IncHI2, IncHI2A, IncI1, IncI2 and IncX (Tables 2 and 5). The  
318 majority of isolates (9/11; 82%) harboured the IncF (FII, FIB, FIC, FIA) and IncY (4/11; 36%).  
319 Four isolates harbouring the IncF incompatibility group also harboured the IncH (n=2) and IncI  
320 (n=2) groups.

321 *In silico* plasmid MLST-analyses assigned the IncF plasmid incompatibility group to STs K:-A-  
322 :B1 and K89:A:-B57 while IncH and IncI plasmids were assigned to ST3. Additionally, nine  
323 (82%) isolates harboured an array of insertion sequences (IS) with IS26, IS421, Isec1 being the  
324 most frequent with a 55% prevalence. An array of three IS (IS26, ISVsa3, ISEc9) were  
325 harboured on the plasmid IncI that also encoded the sulphonamide resistance gene (*sul2*) and  
326 virulence factor (*cib*) in the two *E. coli* ST88 (PR256E1 and PN256E2). Similarly, three isolates  
327 harboured transposons (Tn) including Tn6082 (18%) and Tn7 (9%), with the trimethoprim  
328 resistance gene *dfrA1* being encoded in transposon Tn7 (Table 5).

## 329 **7. Phylogenetic analysis**

330 The contigs of the ESBL-*E. coli* harbouring the most VFs were mapped against the complete  
331 genome of *E. coli* Ecol\_AZ155 (NZ\_CP019005.1) for visualization of the genomic organisation  
332 (Figure 1). Results of comparative genomic analyses revealed specific similarities and  
333 dissimilarities, i.e., isolates had similar and dissimilar arrangements of genomic regions towards  
334 representative and reference genomes (Figure 1).

335 Whole genome phylogenetic analysis grouped the study *E. coli* isolates (n= 11) into two major  
336 clusters (Figure 2). The first one grouped six isolates including two *E. coli* ST2144 (PR209E1,

337 PR246B1C), two ST88 strains (PR256E1, PN256E2), one ST940 (PN091E1II) and one ST4450  
338 (PR085E3). The two *E. coli* ST2144 isolates identified from the same abattoir (SH004) in South  
339 Africa had 100% identity and shared a close common ancestor with *E. coli* ST940 (PN091E3)  
340 and *E. coli* ST4450 (PR085E3) which both originated from one Cameroonian abattoir (SH002).  
341 Similarly, the two ST88 isolates (PR256E1 and PN256E2) displayed 100% identity and were  
342 found to share common ancestor with the *E. coli* ST2144, ST940 and ST4450. The second clade  
343 included four isolates belonging to various STs (i.e., PN256E8: ST9440; PR010E3: ST44;  
344 PN017E1: ST10; PN027E1II: ST226) of which *E. coli* ST10 (PN017E1) and ST44 (PR010E3)  
345 isolated in the same abattoir Cameroon were closely related and shared common ancestor with *E.*  
346 *coli* ST9440 originating from South Africa.

347 The phylogenomic analyses of the isolates with international strains revealed that they were  
348 more closely related to strains from Africa including Kenya, Ghana, Egypt and Morocco than to  
349 any other country. None were phylogenetically related to any strain from United States and  
350 United Kingdom. The genomes from livestock and humans clustered together at some level.  
351 Specifically, PR246B1C and PR209E1 (ST2144), described above to have the same virulome,  
352 resistome and mobilome, as well as PN091E1II (ST940), were in the same cluster and shared  
353 common ancestors with strains isolated from humans and livestock in Kenya, Uganda, South  
354 Africa, Mozambique and Ghana (Figure 3). Similarly, hierarchical clustering analyses provided  
355 evidence of genomic relationship between strains originating from livestock and humans with the  
356 sole *E. coli* ST10 strain (PN017E2) sharing common ancestor with *E. coli* ST10 isolated from  
357 human in Spain and livestock in Luxembourg. Intriguingly, the ST9440 isolate (PN256E8) was  
358 closest to a ST10 isolate (Ec416) from livestock in Vietnam. Phylogenetic tree based on

359 accessory genome within the study isolates and between the international isolates revealed  
360 similar findings (Figure 4).

## 361 **Discussion**

362 ESBL-*E. coli* is responsible of severe infections worldwide. However, genotypic and pathogenic  
363 characteristics of isolates from food-producing animals are not well documented in Cameroon  
364 and South Africa. In this study, the population structure of ESBL-*E. coli* isolated from swine  
365 microbiomes collected at Cameroonian and South African abattoirs were investigated using  
366 WGS. The swine microbiomes from these settings harboured a diverse population of *E. coli*  
367 strains that encode an extensive repertoire of resistance genes and plethora of virulence factors,  
368 and harboured mainly in IncF, IncH and IncY plasmid replicons.

369 The antimicrobial resistance data clearly indicates high resistance level of ESBL-*E. coli* isolates  
370 to ampicillin, cefuroxime, cefotaxime, ceftazidime and trimethoprim-sulfamethoxazole.  
371 Antibiotic use should be limited in agricultural practices and food production systems in order to  
372 curtail the emergence of resistance. Each genome of ESBL-*E. coli* isolated from both countries  
373 harboured chromosomal and plasmid-mediated ARGs. The ESBL phenotype of the isolates has  
374 been confirmed by the presence of ESBL genes (*bla*<sub>CTX-M</sub>, *bla*<sub>OXA-1</sub> and *bla*<sub>TEM-1B</sub>) supporting  
375 other contemporary studies which showed that blaCTX-M-15 is the most prevalent ESBL  
376 variants among *E. coli*, especially in the highly virulent clone ST131 (Mathers et al., 2015; Rafai  
377 et al., 2015). In fact, Rafai et al. (2015) detected 63.7% of ESBL producers in surgical site  
378 infections in Central African Republic. The authors showed that blaCTX-M-15 was present in all  
379 isolates along with aac(6')-Ib-cr. Similar finding were also evidenced by Mbelle et al. (2019)  
380 who reported a 70% of blaCTX-M-15 among hospitalized patients in South Africa.



381 A major observation was the phenotypic multi-drug resistance (MDR) of the isolates PR010E3  
382 and PN256E8 although all isolates, except PR256E1 and PN256E2, harboured concomitantly  
383 resistance genes encoding for resistance to aminoglycosides, tetracyclines and fluoroquinolones.  
384 This finding is in contrast with data readily available from the literature which suggest that  
385 machine or deep learning can be used to predict adequately AMR and MIC of antimicrobial  
386 based on genome sequence data (Hendriksen et al., 2019). While transcription analyses could not  
387 be undertaken to assess the expression of these genes, these observations led us to posit that the  
388 PMQR and QRDR genes as well as aminoglycoside resistance genes present in these isolates  
389 might not have been expressed or be silent. Similar discrepancies regarding the phenomes and  
390 genomes of isolates harbouring resistance genes but not expressing associated phenotypic  
391 resistance were reported elsewhere (Mbelle et al., 2019) and can be further observed in Tables 2  
392 and S2. Our finding further reveals that application of machine or deep learning as well as  
393 comparison between phenome and genome are still needed at a large-scale from various  
394 environments and sources.

395 All isolates were seen as human pathogens with over 93% of pathogenicity score and *E. coli*  
396 APEC-O1-ColBM (DQ381420), *E. coli* UTI89 (CP000243) and *E. coli* K12 DH10B (CP000948)  
397 being the closest related strains. There is increasing evidence that food producing animals and  
398 food products or animal origin may contribute to the spread of ExPEC in the community  
399 (Hammad et al., 2019). In our study, all ESBL-*E. coli* harboured at least three VFs associated  
400 with ExPEC such as *iss*, *iutA*, *traT*, *ompT*, *hlyA*, *iroN*, *papC* and *fimH*. Of great concern is that  
401 the isolate PR085EE3 carried over to 100 VFs with the majority having been identified in  
402 clinical ExPEC. This suggests that commensal bacteria prevailing in the microbiome of food  
403 animals are not only reservoir of resistance genes, but more so, of virulence factors which might

404 be transmitted via HGT and spread to humans through the food chain. It reemphasizes the need  
405 to ensure adequate food safety measures throughout the farm-to-plate continuum along with  
406 effective infection prevention and control measures in hospitals.

407 Biofilm formation, essential in colonization and resistance to antibiotics, is an important  
408 virulence factor in bacteria. Although biofilm-associated genes have been found to be associated  
409 to phylogroup B2 and D strains, biofilm-associated genes such as *fim* and *pap* clusters were  
410 detected in our isolates despite being mainly of phylogroup A and B1. We posit that this might  
411 again be due to HGT of genetic factors which might have allowed our isolates, though  
412 commensals, to acquire these virulence genes horizontally and become putatively virulent in case  
413 of extra-intestinal infections. Moreover, the detection of the heat stable enterotoxin 1 (*astA*)  
414 gene, encoding for the enteroaggregative *E. coli* heat-stable toxin 1 (EAST1), in the sole ST9440  
415 strain (PN256E8), as well as the avian hemolysin (*hlyF*) in PR256E1 (ST88) gives credence to  
416 the fact that commensal *E. coli* prevailing in the gut microbiome have a propensity to acquire  
417 various virulence genes which might therefore evolve as progenitor lineages from which  
418 heteropathogenic *E. coli* including uropathogenic *E. coli* (UPEC), neonatal meningitis-associated  
419 *E. coli* (NMEC) and enteroaggregative *E. coli* (EAEC) strains will emerge.

420 The majority of commensal *E. coli* strains belong to the phylogenetic groups A and B1, whereas  
421 the most common virulent ExPEC are associated with group B2 and D. Our results revealed that  
422 the majority of ESBL-*E. coli* isolates belonged to group A (45%) and B1 (28%). Several reports  
423 confirmed that phylogroups A and B1 are the leading phylogroups among *E. coli* isolates  
424 especially in the gut microbiome (Li et al., 2010; Stoppe et al., 2017). A study from Nigeria  
425 showed that 62% of *E. coli* isolates tended towards the commensal phylogroup B1 and A (Olowe  
426 et al., 2019). The relationship between phylogenetic groups and ABR has been established

427 previously (Olowe et al., 2019) and studies have shown that the group B2 strains are mainly  
428 MDR. However, our study revealed that isolates from other phylogroups such as group A and B1  
429 could also display MDR and high level of virulence certainly as a result of HGT.

430 Despite the limited sample size (11 *E. coli* isolated from 8 pooled samples), our findings reflect  
431 the rich diversity existing within *E. coli* population structure with nine sequence types being  
432 detected. The ESBL- *E. coli* isolates were mainly circulating in two clonal lineages since four  
433 out of seven isolated strains belong to the ST2144 (n=2) and ST88 (n=2). In addition, the MDR-  
434 high-risk clone ST69 and the ST10 were also detected. The ST10 complex, including ST10,  
435 commonly associated with spread of CTX-M-1, CTX-M-2 and CTX-M-9 groups, is highly  
436 distributed among humans and various livestock species and has been linked with intestinal and  
437 extraintestinal infections in several African countries (Rafai et al., 2015). *E. coli* ST10 was the  
438 main ST along with ST131 identified in surgical site infection in Central African Republic (Rafai  
439 et al., 2015). Like other high-risk clones, *E. coli* ST69 possesses biological factors such as *usp*,  
440 *ompT*, secreted autotransporter toxin (*sat*) and *iutA* genes corresponding specifically to ST131  
441 (Mathers et al., 2015), that increases bacterial fitness allowing these strains to out-compete other  
442 bacterial strains and become the principal part of the bacterial population in the gut (Mathers et  
443 al., 2015). The detection of *mcr-1* gene in one isolate suggests that colistin resistant  
444 *Enterobacterales* are also emerging among food-producing animals in Africa, and demonstrates  
445 the urgent need of antimicrobial usage stewardship in food production systems and  
446 implementation of effective monitoring programmes to curb the spread of MDR-*E. coli*.

447 Comparative hierarchical clustering suggested that the majority of our strains belong to two  
448 clusters. It further confirmed that ST10 complex is common in African livestock as all our ST10  
449 complex belong to a unique cgMLST cluster containing closely related isolates from

450 Cameroonian (PR010E3, PN027E1II) and South African swine (PN256E8). The comparative  
451 phylogenomic analysis further confirms that our ESBL-*E. coli* ST10 demonstrated overlap with  
452 ST10 strains isolated from livestock and human populations in Africa (Mozambique, Egypt,  
453 Morocco), Asia (Vietnam), Europe (United Kingdom, Denmark, France) and Oceania (Australia)  
454 and displaying the same phylogroup A. Similarly, our ESBL-*E. coli* ST69 share high level of  
455 similarity with an UPEC ST69 phylogroup D that was involved in pyelonephritis in France  
456 (unpublished data). This gives credence to the hypothesis that commensal *E. coli* of the gut  
457 microbiome might be the reservoir of virulence and resistance genes that allow the emergence of  
458 hetero-pathogenic *E. coli* strains.

459 Mobile genetic elements (MGEs) play an essential role in the mobility of ARGs and VFs  
460 between different bacterial species. The plasmids of the Inc-family are commonly associated  
461 with MDR and VFs in *E. coli* (Rafaï et al., 2015). Ten (91%) of our ESBL-*E. coli* harboured Inc-  
462 related replicons with IncF (9/11; 81%) especially the replicon *FIB* (AP001918; 46%) being the  
463 leading, followed by IncY (4/11, 36%) and IncH (3/11; 21%) plasmids. Similar plasmid  
464 replicons associated with blaCTX-M-group were reported in humans and livestock in Africa and  
465 across the world (Patil, Chen, Lian, & Wen, 2019).

466 Our *E. coli* isolates harboured multiple plasmids belonging to major replicon types and encoding  
467 multiple ARGs and VFs. Given the presence of ESBL-*E. coli* in clinically healthy animals and  
468 humans, it is likely that the presence of these plasmids could contribute to the long-term  
469 persistence of resistance traits in animal and environmental microbiome. Though our study was  
470 limited by the isolates numbers and geographic area, our results sufficiently reinforce the need to  
471 closely monitor pathogenic and commensal bacteria prevailing in the food production systems on  
472 the continent (Patil et al., 2019).

## 473 **Conclusion**

474 Our study demonstrates that the population structure of ESBLs-*E. coli* in swine microbiome is  
475 highly diverse with the *bla*<sub>CTX-M-15</sub> gene being the leading CTX-M variant. Although the  
476 phylogenetic diversity observed precludes any suggestion for clonal dissemination, the resistance  
477 and high human pathogenic potential demonstrate the urgent need to implement effective  
478 strategies to contain the dissemination of antibiotic resistant bacteria in Cameroon and South  
479 Africa. Our study underlines the necessity of long-term and stringent monitoring and molecular  
480 studies investigating population structure of commensal and pathogenic bacteria in (food)  
481 animals, food products and associated environments, not only to preserve antibiotics for future  
482 generations, but also to gain new insights into the diversity, evolutionary history and emergence  
483 of ESBL-ExPEC. The Africa Pathogen Genomics Initiative (Africa PGI,  
484 <https://africacdc.org/download/africa-pathogen-genomics-initiative-factsheet/>) recently launched,  
485 and aiming at integrating pathogenomics and bioinformatics into outbreak investigations and  
486 public health surveillance is expected to advance molecular-based studies and improved  
487 infection control and prevention on the continent.

## 488 **Acknowledgements**

489 The authors would like to thank all included abattoirs, participants and other involved employees  
490 from Cameroon and South Africa for participation and all field work assistance.

491 Preliminary results from this study were presented in a poster at the 30th European Congress of  
492 Clinical Microbiology and Infectious Diseases (ECCMID) in Paris, France, 2020 (abstract 2297).

## 493 **Funding**

494 **L.L. Founou** and **R.C. Founou** are funded by the Antimicrobial Research Unit (ARU) and  
495 College of Health Sciences (CHS) of the University of KwaZulu-Natal, South Africa. The  
496 National Research Foundation funded this study through the NRF Incentive Funding for Rated  
497 Researchers (Grant No. **85595**), and the DST/NRF South African Research Chair in Antibiotic  
498 Resistance and One Health (Grant No. **98342**) awarded to **S.Y. Essack**. The South African

499 Medical Research Council also funded the study through the Self-Initiated Researcher (SIR)  
500 Grant awarded to **S.Y Essack**. The funders had no role in the study design, preparation of the  
501 manuscript nor the decision to submit the work for publication.

#### 502 **Conflict of interest**

503 Professor Essack is a member of the Global Respiratory Infection Partnership and Global  
504 Hygiene Council both sponsored by unrestricted educational grants from Reckitt and Benckiser  
505 Ltd., UK. All other authors declare that there is no competing financial interest.

#### 506 **Author contributions**

507 **L.L.F** co-conceptualized the study, undertook sample collection, microbiological laboratory and  
508 data analyses, prepared tables and figures, interpreted results, performed bioinformatics analysis,  
509 and drafted the manuscript. **R.C.F** undertook sample collection, microbiological laboratory  
510 analyses, contributed to bioinformatics analysis, vetting of the results and writing of the  
511 manuscript. **M.A.** contributed to and vetted bioinformatics analyses. **A.I.** performed whole  
512 genome sequencing analysis. **S.Y.E** co-conceptualized the study and undertook critical revision  
513 of the manuscript. All authors read and approve the final manuscript.

#### 514 **References**

- 515 Alikhan, N., Zhou, Z., Sergeant, M., & Achtman, M. (2018). A genomic overview of the population  
516 structure of Salmonella. *PLoS Genet*, 14(4), e1007261.  
517 doi:<https://doi.org/10.1371/journal.pgen.1007261>
- 518 Aziz, R. K., Bartels, D., Best, A. A., DeJongh, M., Disz, T., Edwards, R. A., et al. (2008). The RAST  
519 Server: rapid annotations using subsystems technology. *BMC Genomics*, 9, 75. doi:10.1186/1471-  
520 2164-9-75
- 521 Bankevich, A., Nurk, S., Antipov, D., Gurevich, A. A., Dvorkin, M., Kulikov, A. S., et al. (2012).  
522 SPAdes: A New Genome Assembly Algorithm and Its Applications to Single-Cell Sequencing. *J*  
523 *Comput Biol*, 19(5), 455-477. doi:10.1089/cmb.2012.0021
- 524 Carattoli, A., Zankari, E., García-Fernández, A., Voldby, L., Lund, O., Villa, L., et al. (2014). In silico  
525 detection and typing of plasmids using PlasmidFinder and plasmid multilocus sequence typing.  
526 *Antimicrob Agents Chemother*, 58(7), 3895-3903.
- 527 Clermont, O., Christenson, J. K., Denamur, E., & Gordon, D. M. (2013). The Clermont Escherichia coli  
528 phylo-typing method revisited: improvement of specificity and detection of new phylo-groups.  
529 *Environ Microbiol Rep*, 5, 58-65. doi:<http://dx.doi.org/10.1111/1758-2229.12019>
- 530 CLSI. (2016). *Performance Standards for Antimicrobial Susceptibility Testing; Twenty-Six Supplement*  
531 *M100S. CLSI document M100-S24* Retrieved from WAYNE, USA:
- 532 Cosentino, S., Voldby Larsen, M., Møller Aarestrup, F., & Lund, O. (2013). PathogenFinder -  
533 Distinguishing Friend from Foe Using Bacterial Whole Genome Sequence Data. *PLoS ONE*,  
534 8(10), e77302. doi:10.1371/journal.pone.0077302
- 535 Durrant, M. G., Li, M. M., Siranosian, B. A., Montgomery, S. B., & Bhatt, A. S. (2020). A Bioinformatic  
536 Analysis of Integrative Mobile Genetic Elements Highlights Their Role in Bacterial Adaptation.  
537 *Cell Host & Microbe*, 27(1), 140-153.e149. doi:<https://doi.org/10.1016/j.chom.2019.10.022>

- 538 EUCAST. (2016). *Breakpoint tables for interpretation of MICs and zone diameters* Retrieved from  
539 <http://www.eucast.org>
- 540 Founou, L. L., Founou, R. C., & Essack, S. Y. (2016). Antibiotic Resistance in the Food Chain: A  
541 Developing Country-Perspective. *Front Microbiol*, 7(1881). doi:10.3389/fmicb.2016.01881
- 542 Founou, L. L., Founou, R. C., Ntshobeni, N., Govinden, U., Bester, L. A., Chenia, H. Y., et al. (2019).  
543 Emergence and Spread of Extended Spectrum beta-Lactamase Producing Enterobacteriaceae  
544 (ESBL-PE) in Pigs and Exposed Workers: A Multicentre Comparative Study between Cameroon  
545 and South Africa. *Pathogens*, 8(1). doi:10.3390/pathogens8010010
- 546 Hammad, A. M., Hoffmann, M., Gonzalez-Escalona, N., Abbas, N. H., Yao, K., Koenig, S., et al. (2019).  
547 Genomic features of colistin resistant Escherichia coli ST69 strain harboring mcr-1 on IncHI2  
548 plasmid from raw milk cheese in Egypt. *Infect Genet Evol*, 73, 126-131.  
549 doi:<https://doi.org/10.1016/j.meegid.2019.04.021>
- 550 Hendriksen, R. S., Bortolaia, V., Tate, H., Tyson, G. H., Aarestrup, F. M., & McDermott, P. F. (2019).  
551 Using Genomics to Track Global Antimicrobial Resistance. *Front Public Health*, 7(242).  
552 doi:10.3389/fpubh.2019.00242
- 553 Joensen KG, Scheutz F, Lund O, Hasman H, Kaas RS, Nielsen EM, & FM, A. (2014). Real-time whole-  
554 genome sequencing for routine typing, surveillance, and outbreak detection of verotoxigenic  
555 Escherichia coli. *J Clin Microbiol*, 52(5), 1501-1510.
- 556 Larsen, M., Cosentino, S., Rasmussen, S., Friis, C., Hasman, H., Marvig, R. L., et al. (2012). Multilocus  
557 sequence typing of total-genome-sequenced bacteria. *J Clin Microbiol*, 50, 1355-1361.  
558 doi:<http://dx.doi.org/10.1128/JCM.06094-11>
- 559 Li, B., Sun, J.-y., Han, L.-z., Huang, X.-h., Fu, Q., & Ni, Y.-x. (2010). Phylogenetic Groups and  
560 Pathogenicity Island Markers in Fecal Escherichia coli Isolates from Asymptomatic Humans in  
561 China. *Appl Environ Microbiol*, 76(19), 6698-6700. doi:10.1128/aem.00707-10
- 562 Liu, B., Zheng, D., Jin, Q., Chen, L., & Yang, J. (2019). VFDB 2019: a comparative pathogenomic  
563 platform with an interactive web interface. *Nucleic Acids Res*, 47(D1), D687-d692.  
564 doi:10.1093/nar/gky1080
- 565 Mathers, A. J., Peirano, G., & Pitout, J. D. D. (2015). The Role of Epidemic Resistance Plasmids and  
566 International High-Risk Clones in the Spread of Multidrug-Resistant Enterobacteriaceae. *Clin*  
567 *Microbiol Rev*, 28(3), 565. doi:10.1128/CMR.00116-14
- 568 Mbelle, N., Feldman, F., Sekyere, J., Maningi, N., Modipane, L., & Essack, S. (2019). The Resistome,  
569 Mobilome, Virulome and Phylogenomics of Multidrug-Resistant Escherichia coli Clinical  
570 Isolates from Pretoria, South Africa. *Sci Rep*. doi:10.1038/s41598-019-52859-2
- 571 Musicha, P., Feasey, N. A., Cain, A. K., Kallonen, T., Chaguza, C., Peno, C., et al. (2017). Genomic  
572 landscape of extended-spectrum  $\beta$ -lactamase resistance in Escherichia coli from an urban African  
573 setting. *J Antimicrob Chemother*, 72(6), 1602-1609. doi:10.1093/jac/dkx058
- 574 Namboodiri, S. S., Opintan, J. A., Lijek, R. S., Newman, M. J., & Okeke, I. N. (2011). Quinolone  
575 resistance in Escherichia coli from Accra, Ghana. *BMC Microbiology*, 11, 44-44.  
576 doi:10.1186/1471-2180-11-44
- 577 Olowe, O. A., Adefioye, O. J., Ajayeoba, T. A., Schiebel, J., Weinreich, J., Ali, A., et al. (2019).  
578 Phylogenetic grouping and biofilm formation of multidrug resistant Escherichia coli isolates from  
579 humans, animals and food products in South-West Nigeria. *Sci Afr*, 6, e00158.  
580 doi:<https://doi.org/10.1016/j.sciaf.2019.e00158>
- 581 Overbeek, R., Olson, R., Pusch, G. D., Olsen, G. J., Davis, J. J., Disz, T., et al. (2014). The SEED and the  
582 Rapid Annotation of microbial genomes using Subsystems Technology (RAST). *Nucleic Acids*  
583 *Res*, 42(Database issue), D206-214. doi:10.1093/nar/gkt1226
- 584 Patil, S., Chen, X., Lian, M., & Wen, F. (2019). Phenotypic and genotypic characterization of multi-drug-  
585 resistant Escherichia coli isolates harboring bla(CTX-M) group extended-spectrum  $\beta$ -lactamases  
586 recovered from pediatric patients in Shenzhen, southern China. *Infect Drug Resist*, 12, 1325-  
587 1332. doi:10.2147/IDR.S199861

- 588 Perovic, O., Singh-Moodley, A., Duse, A., Bamford, C., Elliott, G., Swe-Han, K. S., et al. (2014).  
589 National sentinel site surveillance for antimicrobial resistance in *Klebsiella pneumoniae* isolates  
590 in South Africa, 2010-2012. *S Afr Med J*, *104*(8), 563-568. doi:10.7196/samj.7617
- 591 Rafäi, C., Frank, T., Manirakiza, A., Gaudeville, A., Mbecko, J.-R., Nghario, L., et al. (2015).  
592 Dissemination of IncF-type plasmids in multiresistant CTX-M-15-producing Enterobacteriaceae  
593 isolates from surgical-site infections in Bangui, Central African Republic. *BMC Microbiology*,  
594 *15*(1), 15. doi:10.1186/s12866-015-0348-1
- 595 Sarowska, J., Futoma-Koloch, B., Jama-Kmiecik, A., Frej-Madrzak, M., Ksiazczyk, M., Bugla-  
596 Ploskonska, G., & Choroszy-Krol, I. (2019). Virulence factors, prevalence and potential  
597 transmission of extraintestinal pathogenic *Escherichia coli* isolated from different sources: recent  
598 reports. *Gut Pathog*, *11*, 10-10. doi:10.1186/s13099-019-0290-0
- 599 Stoppe, N. d. C., Silva, J. S., Carlos, C., Sato, M. I. Z., Saraiva, A. M., Ottoboni, L. M. M., & Torres, T.  
600 T. (2017). Worldwide Phylogenetic Group Patterns of *Escherichia coli* from Commensal Human  
601 and Wastewater Treatment Plant Isolates. *Frontiers in Microbiology*, *8*, 2512-2512.  
602 doi:10.3389/fmicb.2017.02512
- 603 Yang, F., Zhang, S., Shang, X., Wang, L., Li, H., & Wang, X. (2018). Characteristics of quinolone-  
604 resistant *Escherichia coli* isolated from bovine mastitis in China. *Journal of Dairy Science*,  
605 *101*(7), 6244-6252. doi:https://doi.org/10.3168/jds.2017-14156
- 606 Zankari, E., Hasman, H., Cosentino, S., Vestergaard, M., Rasmussen, S., Lund, O., et al. (2012).  
607 Identification of acquired antimicrobial resistance genes. *J Antimicrob Chemother*, *67*(11), 2640-  
608 2644.
- 609 Zhou, Y., Liang, Y., Lynch, K. H., Dennis, J. J., & Wishart, D. S. (2011). PHAST: A Fast Phage Search  
610 Tool. *Nucleic Acids Research*, *39*(suppl\_2), W347-W352. doi:10.1093/nar/gkr485

611  
612  
613  
614

## 615 **Figure Legends**

616 **Figure 1. Circular genome representation of selected ESBL-*E. coli* aligned with reference**  
617 **genome and closely related strains.**

618 **Figure 2. Comparative genome analysis based on the core genome MLST of *E. coli* isolates.**

619 **Figure 3. Comparative genome analysis based on the core genome MLST compared with**  
620 **international *E. coli* isolates.**

621 **Figure 4. Comparative genome analysis based on the accessory genome of ESBL-*E. coli***  
622 **isolates**

623  
624



**Table 1. Genotypic characteristics of ESBL-producing *E. coli* isolates (Bioproject PRJNA412434)**

| Isolate           | Accession Number | Country      | Sample type | Abattoir | MLST* | Clonal Complex | FimH sub-typing | Phylogroup | Serotype        |
|-------------------|------------------|--------------|-------------|----------|-------|----------------|-----------------|------------|-----------------|
| <b>PN017E2II</b>  | VMKK00000000     | Cameroon     | Nasal swab  | SH001    | 10    | ST10 Cplx      | FimH215         | A          | O9:H:9          |
| <b>PR010E3I</b>   | VKOQ00000000     | Cameroon     | Rectal swab | SH001    | 44    | ST10 Cplx      | FimH54          | A          | O89:H4          |
| <b>PN027E6IIB</b> | VKOV00000000     | Cameroon     | Nasal swab  | SH001    | 69    | ST69 Cplx      | FimH27          | D          | O-:H18          |
| <b>PR256E1</b>    | VKOS00000000     | South Africa | Rectal swab | SH005    | 88    | ST23 Cplx      | FimH1250        | C          | O: Uncertain H9 |
| <b>PN256E2</b>    | VKOT00000000     | South Africa | Nasal swab  | SH005    | 88    | ST23 Cplx      | FimH1250        | C          | O-:H9           |
| <b>PN027E1II</b>  | VKOW00000000     | Cameroon     | Nasal swab  | SH001    | 226   | ST226 Cplx     | FimH43          | A          | O-:H19          |
| <b>PN091E1II</b>  | VKOU00000000     | Cameroon     | Nasal swab  | SH002    | 940   | ST448 Cplx     | Unknown         | B1         | O-:H33          |
| <b>PN256E8</b>    | QJRZ00000000     | South Africa | Nasal swab  | SH005    | 9440  | ST10 Cplx      | FimH23          | A          | O-:H52          |
| <b>PR209E1</b>    | VKOO00000000     | South Africa | Rectal swab | SH004    | 2144  | -              | FimH87          | B1         | O-:H49          |
| <b>PR246B1C</b>   | WHRW00000000     | South Africa | Rectal swab | SH004    | 2144  | -              | FimH87          | B1         | O-:H49          |
| <b>PR085E3</b>    | VKOP00000000     | Cameroon     | Rectal swab | SH002    | 4450  | -              | FimH566         | A          | O-:H18          |

**Table 2. Overview of resistome and mobilome in ESBL-producing *E. coli* isolates**

| Isolate           | Country      | Sample type | Abattoir | MLST* | β-Lactamase resistance genes |                                                   |               | Fluoroquinolone resistance genes             |                                                   | Other resistance genes                                                                                                                                                            | Plasmids                                                    | pMLST*                         |
|-------------------|--------------|-------------|----------|-------|------------------------------|---------------------------------------------------|---------------|----------------------------------------------|---------------------------------------------------|-----------------------------------------------------------------------------------------------------------------------------------------------------------------------------------|-------------------------------------------------------------|--------------------------------|
|                   |              |             |          |       | <i>BlaCTX-M</i>              | <i>BlaTEM</i>                                     | <i>BlaOXA</i> | QRDR                                         | PMQR                                              |                                                                                                                                                                                   |                                                             |                                |
| <b>PN017E2II</b>  | Cameroon     | Nasal swab  | SH001    | 10    | <i>CTX-M-15</i>              | <i>TEM-1B</i>                                     | -             | -                                            | <i>QnrS1</i>                                      | <i>aph(6)-Ib</i> , <i>aph(3'')-Ib</i> , <i>tet(A)</i> , <i>mph(A)</i> , <i>sul2</i> , <i>dfrA14</i> ,                                                                             | IncY, Col(MG828), Col440I, rep21                            | -                              |
| <b>PR010E3I</b>   | Cameroon     | Rectal swab | SH001    | 44    | <i>CTX-M-15</i>              | -                                                 | <i>OXA-1</i>  | <i>gyrA</i> (p.S83L)<br><i>gyrA</i> (p.D87N) | <i>aac(6')-Ib-cr</i>                              | <i>aac(3)-IIa</i> , <i>aph(3'')-Ib</i> , <i>aadA5</i> , <i>aph(6)-Id</i> , <i>tet(B)</i> , <i>tet(A)</i> , <i>sul1</i> , <i>sul2</i> , <i>dfrA17</i> , <i>floR</i> , <i>catB3</i> | IncFIA, Col440I, IncFII, IncFIB, Col(MG828), rep21          | IncF [F36:A20:B1]              |
| <b>PN027E6IIB</b> | Cameroon     | Nasal swab  | SH001    | 69    | <i>CTX-M-15</i>              | <i>TEM-1B</i>                                     | -             | -                                            | <i>QnrS1</i>                                      | <i>strA</i> , <i>strB</i> , <i>sul2</i> , <i>tet(A)</i> , <i>dfrA14</i>                                                                                                           | IncY, Col(MG828)                                            | -                              |
| <b>PR256E1</b>    | South Africa | Rectal swab | SH005    | 88    | <i>CTX-M-1</i>               | -                                                 | -             | -                                            | -                                                 | <i>tet(A)</i> , <i>sul2</i> ,                                                                                                                                                     | IncI1 <sup>&amp;</sup> , IncI2, Col(MG828), ColPVC, IncFIB, | IncF [K:-A-B1]; IncI1[ST3]     |
| <b>PN256E2</b>    | South Africa | Nasal swab  | SH005    | 88    | <i>CTX-M-1</i>               | -                                                 | -             | -                                            | -                                                 | <i>tet(A)</i> , <i>sul2</i> ,                                                                                                                                                     | IncI1*, IncFIB, Col(MG828), Col440I, rep10                  | IncF [K:-A-B1]; IncI1[ST3]     |
| <b>PN027E1II</b>  | Cameroon     | Nasal swab  | SH001    | 226   | <i>CTX-M-15</i>              | <i>TEM-1B</i>                                     | -             | -                                            | <i>QnrS1</i>                                      | <i>aph(3'')-Ib</i> , <i>aph(6)-Id</i> , <i>tet(A)</i> , <i>mdf(A)</i> , <i>sul2</i> , <i>dfrA14</i> ,                                                                             | IncY, Col440I, colRNAI, Col(MG828)                          | -                              |
| <b>PN091E1II</b>  | Cameroon     | Nasal swab  | SH002    | 940   | <i>CTX-M-15</i>              | <i>TEM-1B</i>                                     | -             | <i>gyrA</i> (p.S83A),                        | -                                                 | <i>aph(3'')-Ib</i> , <i>aph(6)-Id</i> , <i>aadA1</i> , <i>16S_rrsC</i> (g.926_926del), <i>tet(B)</i> , <i>mph(A)</i> , <i>sul2</i> , <i>dfrA1</i> ,                               | IncX, Col440I                                               | -                              |
| <b>PN256E8</b>    | South Africa | Nasal swab  | SH005    | 944   | <i>CTX-M-55</i>              | <i>TEM-1B</i><br><i>TEM-141</i><br><i>TEM-206</i> | -             | -                                            | <i>oqxA</i> , <i>oqxB</i><br><i>aac(6')-Ib-cr</i> | <i>aac(6')-Ib3</i> , <i>aadA5</i> , <i>tet(A)</i> , <i>sul2</i> , <i>dfrA17</i> , <i>floR</i> , <i>mcr-1.1</i> , <i>fosA3</i>                                                     | IncN, IncHI2A, IncHI2                                       | IncN [ST1]; IncHI2 [ST3-like]  |
| <b>PR209E1</b>    | South Africa | Rectal swab | SH004    | 2144  | <i>CTX-M-14</i>              | -                                                 | -             | -                                            | <i>oqxB</i> , <i>oqxA</i>                         | <i>aph(3'')-Ib</i> , <i>aph(6)-Id</i> , <i>aadA2b</i> , <i>aadA1</i> , <i>sul3</i> , <i>cmlA1</i> , <i>fosA3</i>                                                                  | IncFIC(FII), IncFIB, IncHI2A, IncHI2 rep21                  | IncF [K89:A-B57]; IncHI2[ST3]  |
| <b>PR246B1C</b>   | South Africa | Rectal swab | SH004    | 2144  | <i>CTX-M-14</i>              | -                                                 | -             | -                                            | <i>oqxA</i> , <i>oqxB</i>                         | <i>aph(3'')-Ib</i> , <i>aadA2b</i> , <i>aph(6)-Id</i> , <i>aadA1</i> , <i>aph(3'')-Ib</i> , <i>sul3</i> , <i>fosA3</i> , <i>cmlA1</i>                                             | IncFIC(FII), Col440II, IncHI2A, IncHI2, IncFIB              | IncF [K89:A-B57]; IncHI2 [ST3] |
| <b>PR085E3</b>    | Cameroon     | Rectal swab | SH002    | 4450  | <i>CTX-M-15</i>              | -                                                 | -             | -                                            | <i>QnrS1</i>                                      | <i>AadA5</i> , <i>sul2</i> , <i>dfrA17</i>                                                                                                                                        | IncY                                                        | -                              |

**Table 3. *In silico* identification of human pathogenicity and virulence factors in the ESBL-*E. coli* isolates**

| Pathogenicity feature                                   | Nasal Isolates                                                    |                          |                                           |                                                                              |                                                                                                                                                   |             | Rectal isolates                                                                                                                                     |                                                                                                                                                                        |              |                                               |                                                                                                                                                                                           |
|---------------------------------------------------------|-------------------------------------------------------------------|--------------------------|-------------------------------------------|------------------------------------------------------------------------------|---------------------------------------------------------------------------------------------------------------------------------------------------|-------------|-----------------------------------------------------------------------------------------------------------------------------------------------------|------------------------------------------------------------------------------------------------------------------------------------------------------------------------|--------------|-----------------------------------------------|-------------------------------------------------------------------------------------------------------------------------------------------------------------------------------------------|
|                                                         | PN017E2II                                                         | PN027E6IIB               | PN027E1II                                 | PN091E1II                                                                    | PN256E2                                                                                                                                           | PN256E8     | PR010E3I                                                                                                                                            | PR209E1                                                                                                                                                                | PR246B1C     | PR256E1                                       | PR085E3                                                                                                                                                                                   |
| <b>Pathogenicity Score (No. of Pathogenic Families)</b> | 0.934 (615)                                                       | 0.937 (889)              | 0.94 (526)                                | 0.941 (665)                                                                  | 0.927 (735)                                                                                                                                       | 0.932 (625) | 0.94 (677)                                                                                                                                          | 0.939 (710)                                                                                                                                                            | 0.937 (682)  | 0.929 (729)                                   | 0.939 (666)                                                                                                                                                                               |
| <b>Human Pathogenicity</b>                              | Yes                                                               | Yes                      | Yes                                       | Yes                                                                          | Yes                                                                                                                                               | Yes         | Yes                                                                                                                                                 | Yes                                                                                                                                                                    | Yes          | Yes                                           | Yes                                                                                                                                                                                       |
| <b>Virulence factors</b>                                |                                                                   |                          |                                           |                                                                              |                                                                                                                                                   |             |                                                                                                                                                     |                                                                                                                                                                        |              |                                               |                                                                                                                                                                                           |
| <b>Adherence</b>                                        | <i>ecpC, ecpD, ecpE, elfC, elfG, eaeH, hcpB, hcpC, fimD, fimH</i> | <i>lpfA</i>              | <i>elfC, elfG, hcpB, hcpC, fimD, fimH</i> | <i>cfaC, cfaD/cfaE, ecpC, ecpD, ecpE, elfC, elfG, eaeH, hcpB, hcpC, lpfA</i> | <i>hra, lpfA, air, tsh, cfaC, cfaD/cfaE, ecpC, ecpD, ecpE, elfC, elfG, eaeH, focD, focH, hcpB, hcpC, papC, papD, fimD, fimH, pilQ, pilR, pilV</i> | -           | <i>hra, papA_F19, ecpA, ecpB, ecpC, ecpD, ecpE, elfA, elfC, elfD, elfG, eaeH, hcpA, hcpB, hcpC, papI, fimA, fimC, fimD, fimE, fimF, fimG, fimH,</i> | <i>lpfA, cfaA, cfaB, cfaD/cfaE, ecpA, ecpB, ecpC, ecpD, ecpE, elfA, elfC, elfD, elfG, eaeH, hcpA, hcpB, hcpC, papI, fimA, fimC, fimD, fimE, fimF, fimG, fimH, fimI</i> | <i>lpfA,</i> | <i>papC, focCsjaE, focF, focI, lpfA, tsh,</i> | <i>hra, lpfA, air, papC, tsh, cfaC, cfaD/cfaE, ecpC, ecpD, ecpE, elfC, elfG, eaeH, focC, hcpB, hcpC, papC, fimC, fimD, fimH, lfhA, prl/gapA, cgsG, pilW, staB, staC, stfC, stfD, stgB</i> |
| <b>Autotransporter</b>                                  | <i>EhaB</i>                                                       | -                        | <i>aatA, ehaB, upaG/ehaG</i>              | <i>ehaB, upaG/ehaG</i>                                                       | <i>agn43, ehaB, upaG/ehaG,</i>                                                                                                                    | -           | <i>cah, ehaB</i>                                                                                                                                    | <i>air/eahX, ehaA, ehaB, upaG/ehaG,</i>                                                                                                                                | -            | -                                             | <i>cah, ehaA, ehaB, upaG/ehaG,</i>                                                                                                                                                        |
| <b>Iron Uptake</b>                                      | -                                                                 | <i>fyuA, irp2, sitA,</i> | -                                         | <i>fyuA, irp1, irp2, ybtA, ybtE, ybtP, ybtS, ybtT, ybtU, ybtX</i>            | <i>iucA, iucB, iucC, iucD, iutA, sitA, sitB, sitC, iroB, iroC, iroE, iroN, fyuA, irp1, irp2, ybtA, ybtE, ybtP, ybtS, ybtT, ybtU, ybtX</i>         | -           | <i>iutA, iucC, iucA, iucB, iucC, iucD, sitA, sitB, sitC, sitD</i>                                                                                   | -                                                                                                                                                                      | -            | <i>irp2, iucC, iutA, iroN, fyuA,</i>          | <i>iroN, ccmF, entA, entB, entC, entE, entF, fepB, fepC, fepD, fepG, hemC, hemE, hemH, hemL, hemN</i>                                                                                     |

**Table 3. Continued**

| Pathogenicity feature          | Nasal Isolates                                                                   |                                     |                                                                      |                                                                                  |                                                                                         |                   | Rectal isolates                                                                         |                                                                                                |                         |                                          |                                                                                                                                                                                                                                                                                 |
|--------------------------------|----------------------------------------------------------------------------------|-------------------------------------|----------------------------------------------------------------------|----------------------------------------------------------------------------------|-----------------------------------------------------------------------------------------|-------------------|-----------------------------------------------------------------------------------------|------------------------------------------------------------------------------------------------|-------------------------|------------------------------------------|---------------------------------------------------------------------------------------------------------------------------------------------------------------------------------------------------------------------------------------------------------------------------------|
|                                | PN017E2II                                                                        | PN027E6IIB                          | PN027E1II                                                            | PN091E1III                                                                       | PN256E2                                                                                 | PN256E8           | PR010E3I                                                                                | PR209E1                                                                                        | PR246B1C                | PR256E1                                  | PR085E3                                                                                                                                                                                                                                                                         |
| <b>Secretion system</b>        | <i>aec15, aec18, aec22, aec23, aec25, aec26, aec27/clpV, aec29, aec30, aec31</i> | -                                   | -                                                                    | <i>aec15, aec18, aec22, aec23, aec25, aec26, aec27/clpV, aec29, aec30, aec31</i> | <i>aec15, aec18, aec22, aec23, aec25, aec26, aec27/clpV, aec28, aec29, aec30, aec31</i> | -                 | <i>aec15, aec18, aec22, aec23, aec25, aec26, aec27/clpV, aec28, aec29, aec30, aec31</i> | <i>aec15, aec18, aec22, aec23, aec25, aec26, aec27/clpV, aec28, aec29, aec30, aec31, aec32</i> | -                       | <i>etsC,</i>                             | <i>aec15, aec18, aec22, aec23, aec25, aec26, aec27/clpV, aec28, aec29, aec30, aec31, aec32, flgD, flgE, flgF, flgI, flgJ, flgK, flgL, flhA, flhB, flhA, fliF, flil, fliM, fliR, ipaH, gspC, gspD, gspE, gspF, gspK, gspL, clpB, rmkB, wbjD/wecB, wecC, galF, ugd, wcaI, wzc</i> |
| <b>Antiphagocytosis</b>        | <i>wzc, wzi</i>                                                                  | -                                   | -                                                                    | <i>wzc, wzi, wbaZ</i>                                                            | -                                                                                       | -                 | <i>Wzi</i>                                                                              | -                                                                                              | -                       | -                                        | -                                                                                                                                                                                                                                                                               |
| <b>Toxins</b>                  | <i>hlyE/clyA</i>                                                                 | -                                   | -                                                                    | -                                                                                | <i>HlyF, astA, vat</i>                                                                  | <i>astA</i>       | <i>hlyE/clyA,</i>                                                                       | <i>hlyE/clyA,</i>                                                                              | -                       | <i>hlyF,</i>                             | <i>hlyE/clyA, hlyA</i>                                                                                                                                                                                                                                                          |
| <b>Protectins and invasins</b> | <i>ibeB, ibeC</i>                                                                | <i>KpsE, kpsMIII_K96; iss, ompT</i> | <i>ibeB, ibeC</i>                                                    | <i>iss ibeB, ibeC</i>                                                            | <i>KpsE, kpsMIII_K96, iss, ompT, traT, ibeB, ibeC</i>                                   | <i>ompT,</i>      | <i>traT, ibeB, ibeC, tia</i>                                                            | <i>iss, ompT, ibeB, ibeC,</i>                                                                  | <i>traT, ompT, iss,</i> | <i>Iss, ompT, traT,</i>                  | <i>ibeB, ibeC, cheB, cheR, motA,</i>                                                                                                                                                                                                                                            |
| <b>Miscellaneous</b>           | <i>espL1, espL4, espX1, espY1, galE, rmlD, gad, terC</i>                         | <i>air, terC, gad, chuA, eilA,</i>  | <i>espL1, espL4, espX1, espX4, espL1, espL4, espX1, espX5, rmlD,</i> | <i>espL1, espL4, espX4, terC, gad,</i>                                           | <i>mchB, mchC, mchF, mcmA, terC, gad, eilA</i>                                          | <i>terC, gad,</i> | <i>espL1, espL4, espX1, espX4, espX5, espY1, gad, terC, rmlD, galE, cea</i>             | <i>espL1, espL4, espX1, espX4, espX5, terC, gad, adeG</i>                                      | <i>gad, terC,</i>       | <i>cea, cib, mchB, mchC, mcmA, terC,</i> | <i>espL1, espL4, espR1, espX5, galE, galU, mrsA/glmM, pgi, acpXL, rmlA, rmlD, rpoS, phoQ, glnA1, narH, sugC, acrB, farB, icl, mgtB, motB, bioB, katG, gmhA/lpcA, htrB, kdsA, kdtA, lpxA, lpxB, lpxK, msbA, opsX/rfaC, rfaD, rfaE, rfaF, wecA</i>                                |

**Table 4. Virulence-associated-traits of nasal and rectal ESBL-*E. coli***

| Functional categories traits | Virulence factors                      | Overall, n=11 (%) | Nasal Isolates (n=5) | Rectal Isolates (n=6) |
|------------------------------|----------------------------------------|-------------------|----------------------|-----------------------|
| <b>Adhesins</b>              |                                        |                   |                      |                       |
| <i>papACEFG</i>              | P fimbriae                             | 4 (36)            | 1                    | 3                     |
| <i>fimH</i>                  | Type 1 fimbriae                        | 7 (64)            | 3                    | 4                     |
| <i>hra</i>                   | Heat-resistant agglutinin              | 1 (9)             | 0                    | 1                     |
| <i>tsh</i>                   | Temperature sensitive hemagglutinin    | 2 (18)            | 1                    | 1                     |
| <i>Sfa/foc</i>               | S or F1C fimbriae                      | 1 (9)             | 0                    | 1                     |
| <b>Toxins</b>                |                                        |                   |                      |                       |
| <i>hlyD</i>                  | $\alpha$ -hemolysin                    | 1 (9)             | 0                    | 1                     |
| <i>hlyE</i>                  | hemolysin E                            | 4 (36)            | 1                    | 3                     |
| <i>hlyA</i>                  | Hemolysin A                            | 1 (9)             | 0                    | 1                     |
| <i>hlyF</i>                  | putative avian hemolysin               | 2 (18)            | 1                    | 1                     |
| <i>astA</i>                  | Enteroaggregative <i>E. coli</i> toxin | 1 (9)             | 1                    | 0                     |
| <i>vat</i>                   | Vacuolating toxin                      | 1 (9)             | 1                    | 0                     |
| <b>Siderophore</b>           |                                        |                   |                      |                       |

|                                |                                             |        |   |   |
|--------------------------------|---------------------------------------------|--------|---|---|
| <i>iroN</i>                    | Salmochelins receptor                       | 2 (18) | 1 | 1 |
| <i>fyuA</i>                    | Yersiniabactin receptor                     | 3 (27) | 3 | 0 |
| <i>iutA</i>                    | Aerobactin receptor                         | 2 (18) | 1 | 1 |
| <i>sitA</i>                    | Periplasmic iron binding protein            | 3 (27) | 2 | 1 |
| <b>Protectins and Invasins</b> |                                             |        |   |   |
| <i>kpsM_III</i>                | Group 3 capsule                             | 2 (18) | 2 | 0 |
| <i>kpsE</i>                    | Group 2 capsule                             | 2 (18) | 2 | 0 |
| <i>iss</i>                     | Increased serum survival                    | 6 (55) | 3 | 3 |
| <i>traT</i>                    | Conjugal transfer surface exclusion protein | 2 (18) | 0 | 2 |
| <i>ompT</i>                    | Outer membrane protease T                   | 6 (55) | 2 | 4 |
| <i>ibeB</i>                    | Invasin of brain endothelial cells, IbeA    | 8 (73) | 4 | 4 |
| <i>ibeC</i>                    | Invasin of brain endothelial cells, IbeC    | 8 (73) | 4 | 4 |
| <i>UpaG/ehaG</i>               | Autotransporter adhesin UpaG and EhaG       | 6 (55) | 3 | 3 |
|                                | Autotransporter proteins                    |        |   |   |
| <i>ehaB</i>                    | Autotransporter adhesin                     | 8 (73) | 4 | 4 |

**Table 5. Mobile genetic elements detected in the ESBL-*E. coli* isolates**

| Isolate (ST)    | Plasmids                                                    | Insertion sequence                                                                                        | Transposons      | Phages                                                                                            | CRISPR array (Cas system) | TR  |
|-----------------|-------------------------------------------------------------|-----------------------------------------------------------------------------------------------------------|------------------|---------------------------------------------------------------------------------------------------|---------------------------|-----|
| PN017E2II (10)  | IncY, Col(MG828), Col440I, rep21                            | -                                                                                                         | -                | -                                                                                                 | 6 (Cas1)                  | 54  |
| PR010E3I (44)   | IncFIA, Col440I, IncFII, IncFIB, Col(MG828), rep21          | -                                                                                                         | -                | -                                                                                                 | 8 (Cas1, Cas3)            | 48  |
| PN027E6IIB (69) | IncY, Col(MG828)                                            | ISKpn19, ISEc1, ISEc31, IS4, ISSfl10, IS911, cn_5813_IS911, MITEEc1, ISEc1, ISEc38, IS629, ISEc46, IS5075 | -                | PHAGE_EnteromEp460_NC_019716                                                                      | 5 (Cas1)                  | 54  |
| PR256E1 (88)    | IncII <sup>&amp;</sup> , IncI2, Col(MG828), ColPVC, IncFIB, | IS26, ISVsa3, ISSbo1, cn_3792_ISSbo1, ISEc9, ISEc40, ISEc38, ISEc13                                       | -                | PHAGE_EnterofiAA91_ss_NC_022750<br>PHAGE_ShigelSfII_NC_021857(34)<br>PHAGE_EnteromHK544_NC_019767 | 6 (Cas2)                  | 51  |
| PN256E2 (88)    | IncII <sup>*</sup> , IncFIB, Col(MG828), Col440I, rep10     | IS26, ISVsa3, ISEc9                                                                                       | -                | -                                                                                                 | 10 (Cas3)                 | 101 |
| PN027E1II (226) | IncY, Col440I, colRNAI, Col(MG828)                          | ISKpn19, ISEsa1, IS5075, MITEEc1, IS100, ISEc30, IS5, ISEc26, ISKpn8, IS421, IS609, ISEc38, IS30, IS903   | -                | -                                                                                                 | 11 (Cas3, Cas1)           | 55  |
| PN091E1II (940) | IncX, Col440I                                               | IS6100, MITEEc1, IS421, ISEc30, ISSfl10, IS30, ISEc38, ISEc1, IS100, ISKpn8                               | Tn7 <sup>#</sup> | PHAGE_EnteromBP_4795_NC_004813                                                                    | 5 (Cas2)                  | 40  |
| PN256E8 (944)   | IncN, IncHI2A, IncHI2                                       | ISVsa3, IS640, IS100, ISEam1, IS30, MITEEc1, ISEc1, ISKpn26, IS421, ISVsa5, IS609                         | -                | PHAGE_ShigelSfII_NC_021857(34)                                                                    | 8 (Cas2)                  | 87  |
| PR209E1 (2144)  | IncFIC(FII), IncFIB, IncHI2A, IncHI2 rep21                  | IS102, IS629, MITEEc1, ISKpn8, ISVsa5, IS421, IS3, IS26                                                   | Tn6082           | PHAGE_ShigelSf6_NC_005344<br>PHAGE_ShigelSf6_NC_005344<br>PHAGE_ShigelSfII_NC_021857(34)          | 6 (Cas2)                  | 44  |
| PR246B1C (2144) | IncFIC(FII), Col440II, IncHI2A, IncHI2, IncFIB              | IS102, IS3, IS629, IS26, ISEc1, ISKpn8, ISVsa5, IS421, MITEEc1                                            | Tn6082           | PHAGE_ShigelSf6_NC_005344<br>PHAGE_ShigelSfII_NC_021857<br>PHAGE_EnterofiAA91_ss_NC_022750        | 8                         | 41  |
| PR085E3 (4450)  | IncY                                                        | ISVsa3, ISEc9, IS421, ISKpn26, IS3, ISEc1, ISEc38, MITEEc1, IS26, IS102                                   | -                | PHAGE_EnteromEp460_NC_019716<br>PHAGE_Pseudo_phiPSA1_NC_024365<br>PHAGE_EnterofiAA91_ss_NC_022750 | 4 (Cas3)                  | 39  |

**TR: Tandem Repeat**

**Syntenly of resistance and virulence genes and MGEs**

<sup>&</sup>IncII (harbours 3 MGEs i.e IS26, ISVsa3, ISEc9 and encoded *sul2* and *cib*)

<sup>\*</sup>IncII (harbours 3 MGEs i.e IS26, ISVsa3, ISEc9 and encoded *sul2* and *cib*)

<sup>#</sup>Tn7 (harbouring *dfrA1*)

**Table 6. Virulence factors commonly present in ExPEC**

| Type                           | Associated virulence genes/proteins/enzyme                                                                                                                                                                                                                                                                                                                                                                 |
|--------------------------------|------------------------------------------------------------------------------------------------------------------------------------------------------------------------------------------------------------------------------------------------------------------------------------------------------------------------------------------------------------------------------------------------------------|
| <b>Toxins</b>                  | hlyD ( $\alpha$ -hemolysin), hlyA (hemolysin A), sat (secreted autotransporter toxin), pic (serine protease), vat (vacuolating toxin), astA (enteroaggregative <i>E. coli</i> toxin), cnf1 (cytotoxic necrotizing factor), cdt1 (cytolethal distending toxin), clb (colibactin)                                                                                                                            |
| <b>Adhesins</b>                | papACEFG (P fimbriae), sfa/foc (S or F1C fimbriae), focG (F1C fimbriae adhesin), iha (adhesion siderophore), fimH (type 1 fimbriae), tsh (temperature sensitive hemagglutinin), hra (heat-resistant agglutinin), afa/draBC (D-binding adhesins), gaf (N-acetyl-D-glucosamine-specific fimbriae), bmaE (M fimbriae), iha (bifunctional enterobactin receptor/adhesion), ecpA ( <i>E. coli</i> common pilus) |
| <b>Siderophore</b>             | iroN (salmochelins receptor), fyuA (yersiniabactin receptor), ireA (siderophore receptor), iutA (aerobactin receptor), sitA (periplasmic iron binding protein)                                                                                                                                                                                                                                             |
| <b>Protectins and invasins</b> | kpsM II (group 2 capsule), K1 (K1 group 2 capsule variants), K2 (K2 group 2 capsule variants), K5 (K5 group 2 capsule variants); KpsMT III (group 3 capsule), ibeA (invasion of brain endothelium), Cva (colicin V), traT (conjugal transfer surface exclusion protein), iss (increased serum survival), ompT (outer membrane protease T)                                                                  |
| <b>Others</b>                  | Usp (uropathogenic-specific protein), uidA ( $\beta$ -glucuronidase), H7 filC (flagellin variant), malX (pathogenicity island marker), dsdA (D-serine deaminase)                                                                                                                                                                                                                                           |



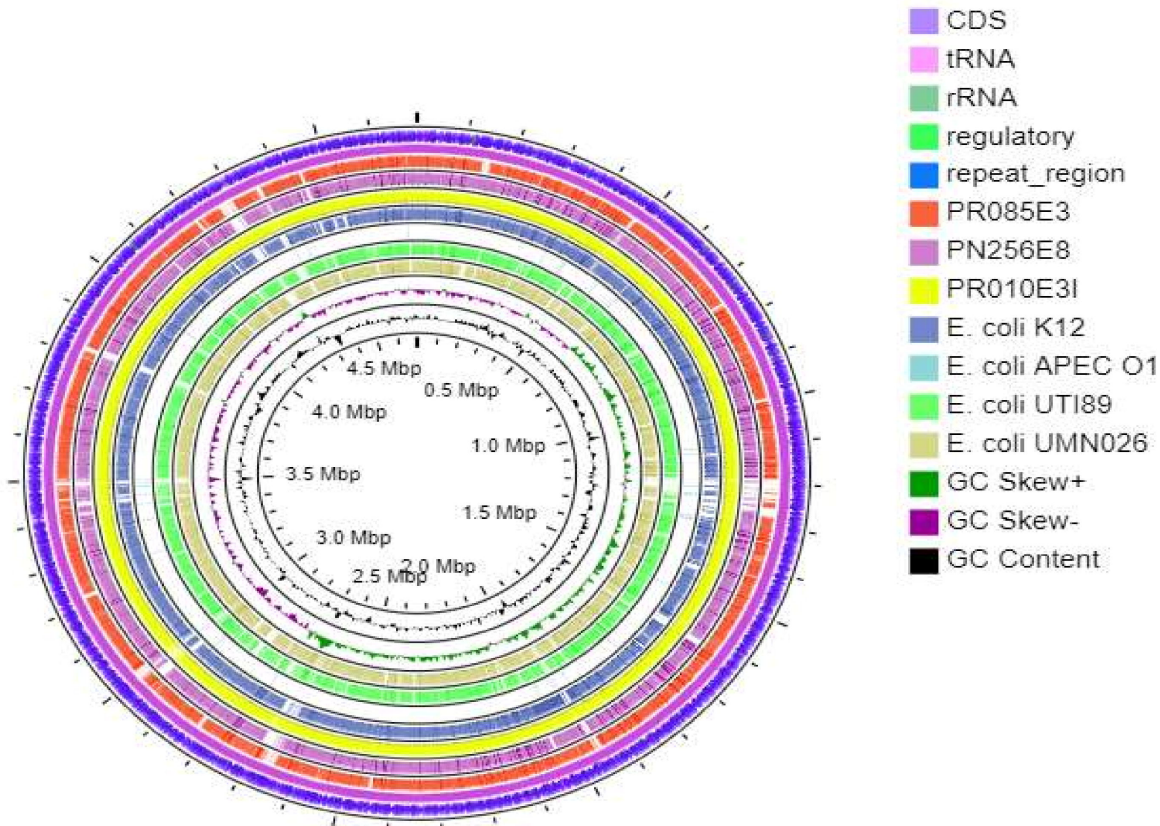

**Figure 1. Circular genome representation of selected ESBL-*E. coli* aligned with reference genome and closely related strains.** Circular map of selected ESBL-*E. coli* (PR010E3, PN256E8 and PR085E3) and comparative alignment with closely related strains (*E. coli* K12, *E. coli* APEC\_O1, *E. coli* UTI89, *E. coli* UMN026), generated using CGView Server V1.0. Coloured arrows in the outer ring represent different gene families of the reference genome. A key of the coloured arrows representing different gene families is presented in the inset. The inner coloured circles representing different strains are also listed in the inset. Innermost circles show GC content indicated in black and GC Skew, with green and purple indicating positive and negative values, respectively.

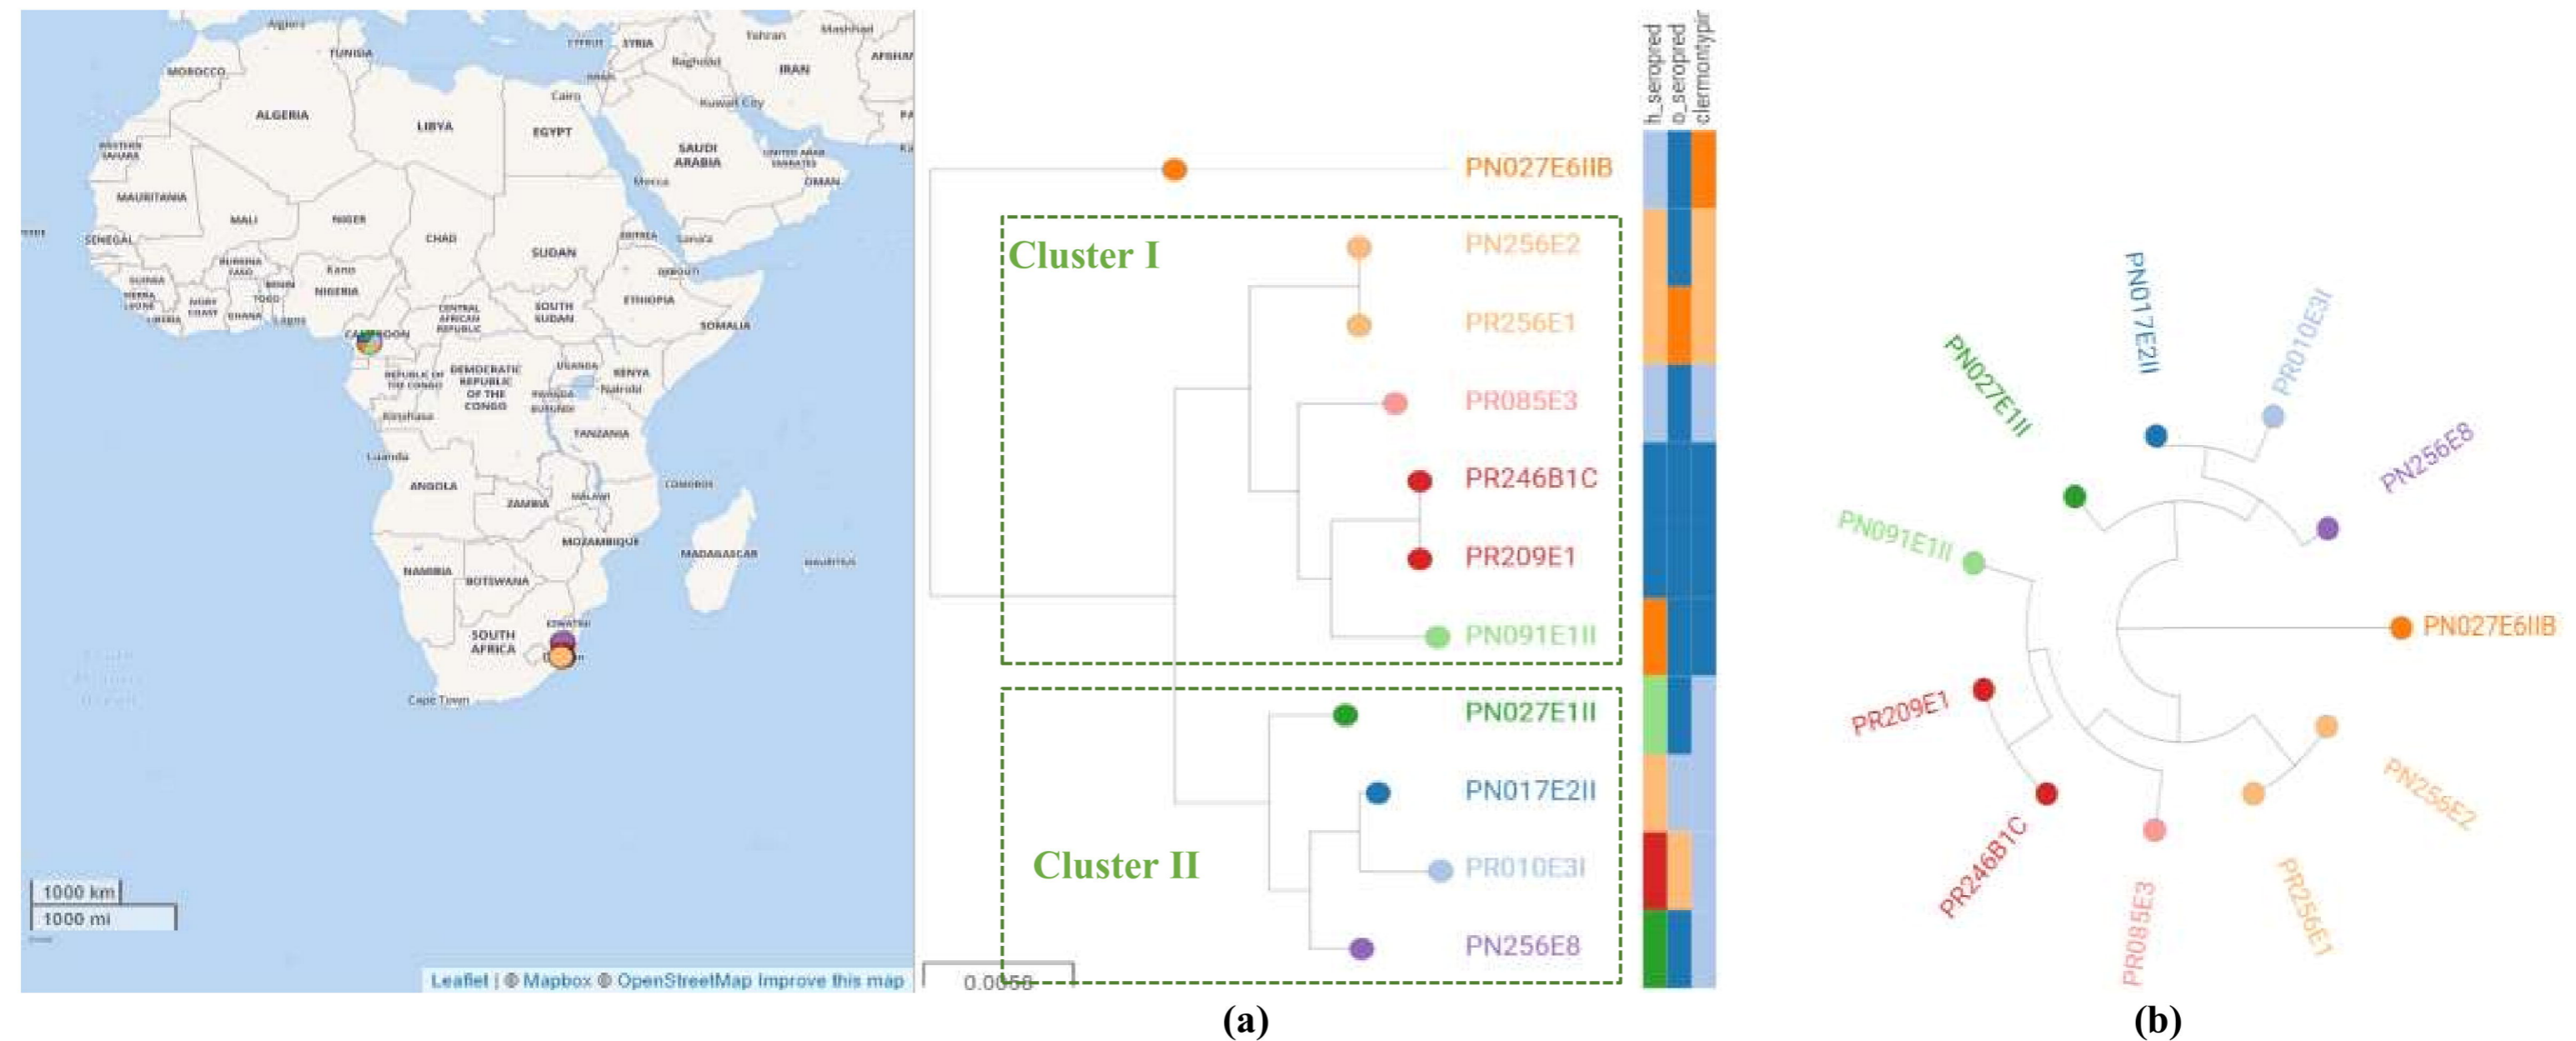

**Figure 2. Comparative genome analysis based on the core genome MLST of *Escherichia coli* isolates.** Each node represents an isolate, each of which is coloured according to its sequence type, as defined using the core genome. Clusters of isolates belonging to the same sequence cluster are encircled and annotated. Serotype and phylogroup are also indicated via a heatmap (a) Core-genome phylogenetic tree based on comparison of conserved clusters of orthologous genes (COGs). (b) Minimum spanning tree based on cgMLST. Interactive map of geographic locations and genetic attributes can be visualized within Microreact at <https://microreact.org/project/tYENaUrCix7jMS7RBrFeBi/09dce9ac>

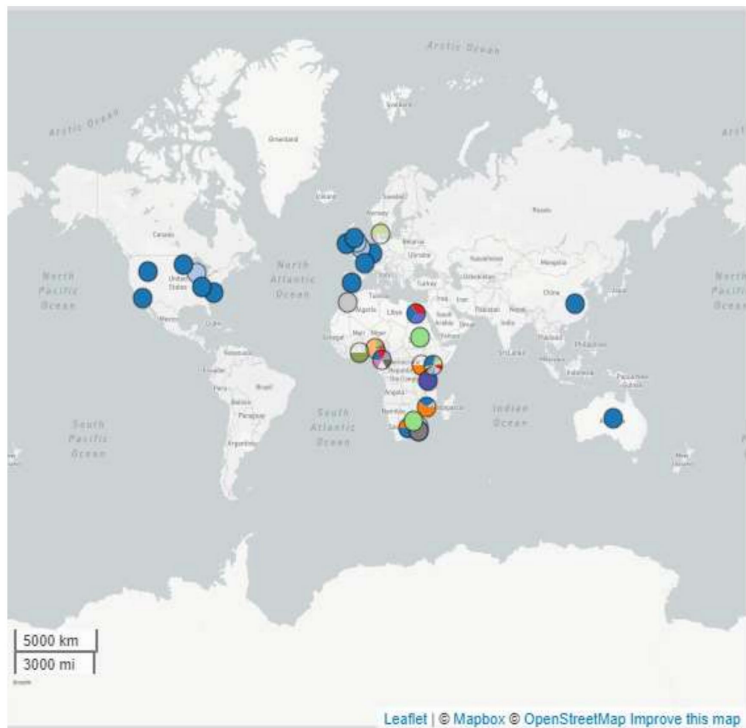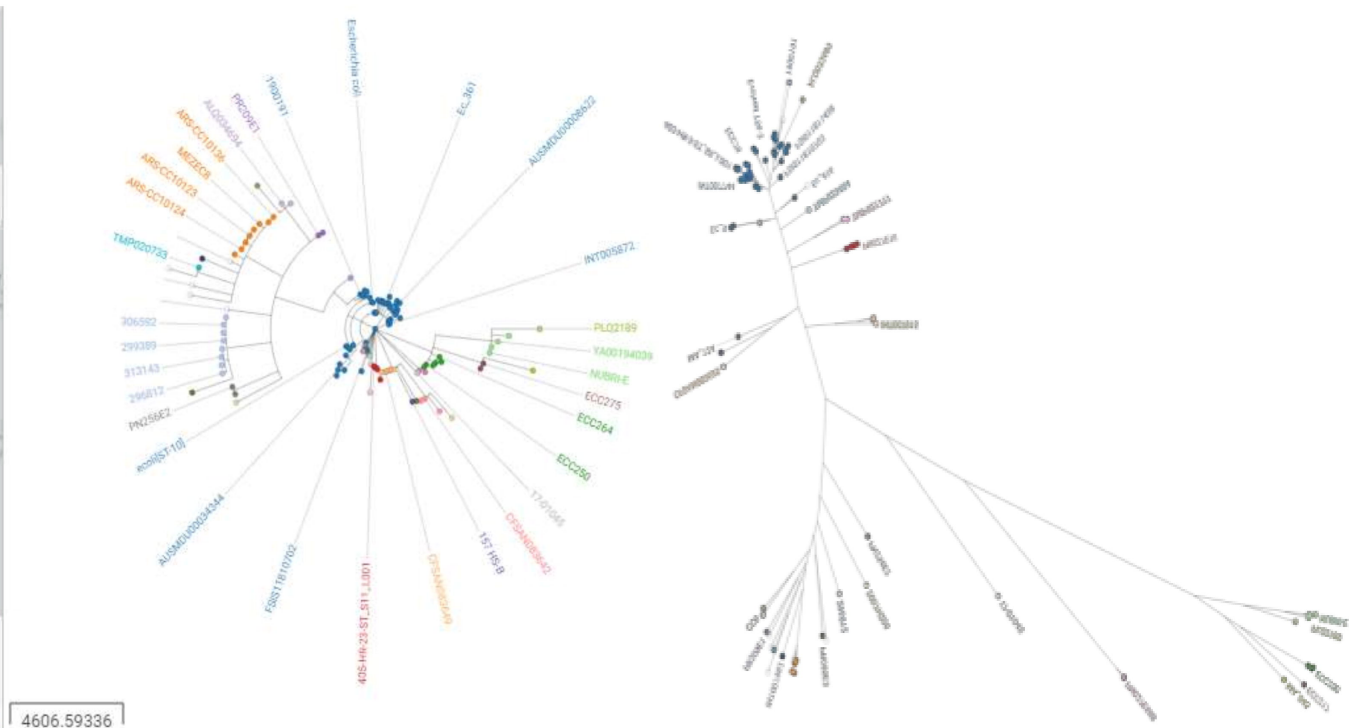

(a)

(b)

**Figure 3. Comparative genome analysis based on the core genome MLST of the ESBL-*E. coli* with international *E. coli* isolates.** Isolates of the same STs share the same colour. (a) Minimum spanning tree generated using cgMLST. (b) GrapeTree generated using MSTree V2 tool. Interactive map of geographic locations and genetic attributes can be visualized within Microreact at <https://microreact.org/project/2kL6oNgm6VPKnUrrffkUD5/81a2cc99>

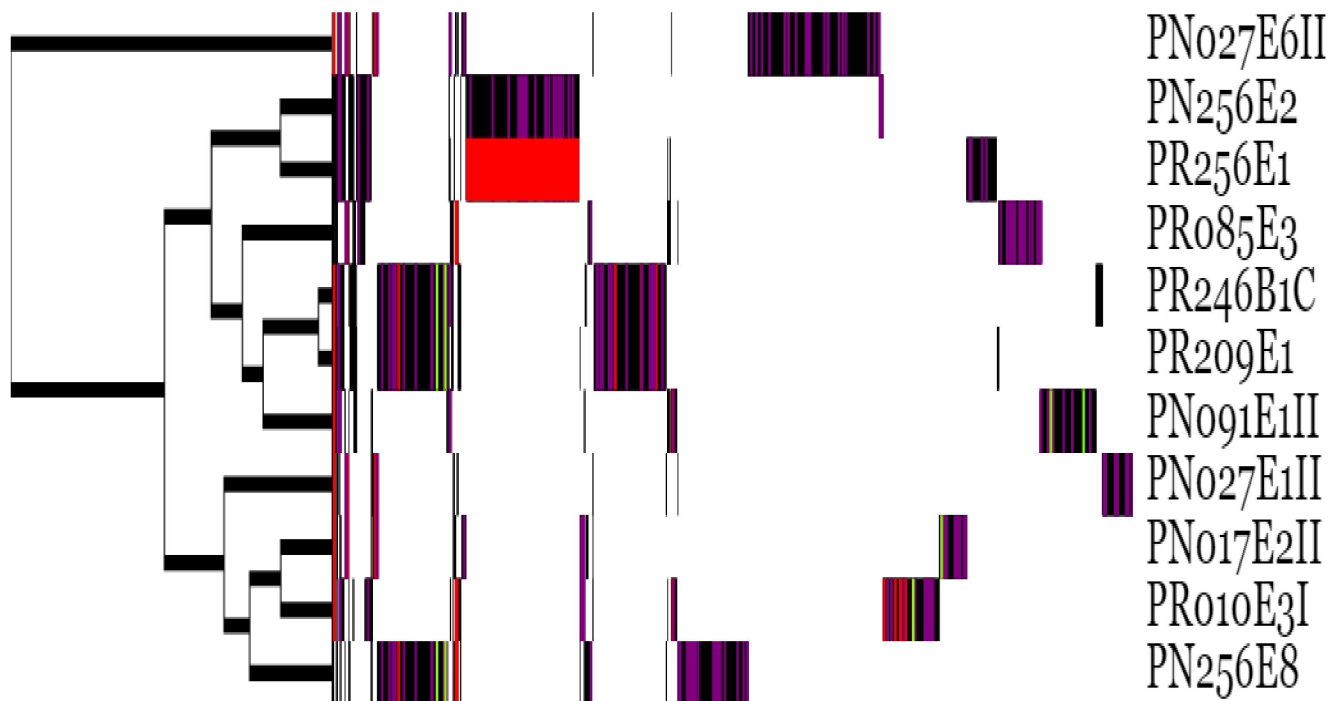

**Figure 4. Comparative genome analysis based on the accessory genome of the ESBL-*E. coli* isolates.** AMR genes are coloured in red, phages genes (VOGs) in purple and plasmids in are represented in green.
